# Supplementary material for: Transcriptomic analysis of chicken Myozenin 3 regulation reveals its potential role in cell proliferation
Source: PLoS One. 2017 Dec 13;12(12):e0189476. doi: 10.1371/journal.pone.0189476 (PMC5728575; doi:10.1371/journal.pone.0189476)
Supplement: S2 Table — Reads mapping information. (XLSX) [file pone.0189476.s003.xlsx]

## Sheet: MapStat
Sample name	NC1	NC2	NC3	inter_1	inter_2	inter_3	con_1	con_2	con_3	O_exp_1	O_exp_2	O_exp_3
Total reads	44243376	51975948	52412854	46933982	64642808	50680960	68204422	70453214	63623934	54493814	58586504	54973256
Total mapped	36776081 (83.12%)	43762946 (84.2%)	43677083 (83.33%)	39069695 (83.24%)	54294774 (83.99%)	42828656 (84.51%)	55293800 (81.07%)	56880026 (80.73%)	51083462 (80.29%)	43764431 (80.31%)	48011414 (81.95%)	44773157 (81.45%)
Multiple mapped	3143277 (7.1%)	3548296 (6.83%)	3122804 (5.96%)	2531864 (5.39%)	4025252 (6.23%)	3439917 (6.79%)	1873623 (2.75%)	1934812 (2.75%)	1793298 (2.82%)	1468539 (2.69%)	1395289 (2.38%)	1242564 (2.26%)
Uniquely mapped	33632804 (76.02%)	40214650 (77.37%)	40554279 (77.37%)	36537831 (77.85%)	50269522 (77.77%)	39388739 (77.72%)	53420177 (78.32%)	54945214 (77.99%)	49290164 (77.47%)	42295892 (77.62%)	46616125 (79.57%)	43530593 (79.19%)
Read-1	17301295 (39.1%)	20506265 (39.45%)	20806121 (39.7%)	18698303 (39.84%)	25481741 (39.42%)	19938535 (39.34%)	27082771 (39.71%)	27890060 (39.59%)	25170293 (39.56%)	21621548 (39.68%)	23832081 (40.68%)	22234432 (40.45%)
Read-2	16331509 (36.91%)	19708385 (37.92%)	19748158 (37.68%)	17839528 (38.01%)	24787781 (38.35%)	19450204 (38.38%)	26337406 (38.62%)	27055154 (38.4%)	24119871 (37.91%)	20674344 (37.94%)	22784044 (38.89%)	21296161 (38.74%)
Reads map to '+'	16822516 (38.02%)	20107091 (38.69%)	20280340 (38.69%)	18271889 (38.93%)	25137460 (38.89%)	19696777 (38.86%)	26738552 (39.2%)	27501493 (39.04%)	24668181 (38.77%)	21169250 (38.85%)	23335985 (39.83%)	21788453 (39.63%)
Reads map to '-'	16810288 (38%)	20107559 (38.69%)	20273939 (38.68%)	18265942 (38.92%)	25132062 (38.88%)	19691962 (38.85%)	26681625 (39.12%)	27443721 (38.95%)	24621983 (38.7%)	21126642 (38.77%)	23280140 (39.74%)	21742140 (39.55%)
Non-splice reads	19863817 (44.9%)	23620678 (45.45%)	24419862 (46.59%)	22085442 (47.06%)	29750889 (46.02%)	22831471 (45.05%)	28863497 (42.32%)	29431340 (41.77%)	27161838 (42.69%)	22667508 (41.6%)	25821939 (44.07%)	24008226 (43.67%)
Splice reads	13768987 (31.12%)	16593972 (31.93%)	16134417 (30.78%)	14452389 (30.79%)	20518633 (31.74%)	16557268 (32.67%)	24556680 (36%)	25513874 (36.21%)	22128326 (34.78%)	19628384 (36.02%)	20794186 (35.49%)	19522367 (35.51%)
