# Supplementary material for: Transcriptomic analysis of chicken Myozenin 3 regulation reveals its potential role in cell proliferation
Source: PLoS One. 2017 Dec 13;12(12):e0189476. doi: 10.1371/journal.pone.0189476 (PMC5728575; doi:10.1371/journal.pone.0189476)
Supplement: S5 Table — Counts table that generated by HTseq. (XLSX) [file pone.0189476.s006.xlsx]

geneID	NC1	NC2	NC3	inter_1	inter_2	inter_3	con_1	con_2	con_3	O_exp_1	O_exp_2	O_exp_3
ENSGALG00000016661	150	254	119	171	242	207	132	183	128	65	150	75
ENSGALG00000041808	37	21	17	19	45	26	37	39	29	21	46	24
ENSGALG00000037530	0	1	1	7	7	3	0	1	1	1	1	3
ENSGALG00000033235	150	156	168	95	165	170	395	352	316	251	219	229
ENSGALG00000030388	0	0	0	0	0	0	0	0	0	0	0	0
ENSGALG00000036948	0	0	0	0	0	0	0	0	0	0	0	0
ENSGALG00000040571	0	0	0	0	0	0	0	0	0	0	0	0
ENSGALG00000016287	4	6	10	9	20	12	18	22	21	16	10	10
ENSGALG00000000406	0	0	0	0	0	1	0	0	4	0	0	1
ENSGALG00000041367	0	0	0	0	0	0	0	0	0	0	0	0
ENSGALG00000003063	17	24	19	27	34	20	84	112	65	65	70	89
ENSGALG00000037276	0	2	2	1	3	1	0	3	1	2	0	0
ENSGALG00000025222	3	1	3	2	4	2	0	0	1	0	0	1
ENSGALG00000003010	877	1071	1094	939	1309	1038	1234	1257	1172	1054	1199	1077
ENSGALG00000004659	526	666	691	596	842	631	1124	1356	1041	964	992	959
ENSGALG00000026995	56	90	53	57	110	109	186	331	179	131	135	102
ENSGALG00000015928	25	35	31	35	54	26	19	19	23	19	21	16
ENSGALG00000025427	0	0	0	0	0	0	0	0	0	0	0	0
ENSGALG00000037092	0	0	0	0	0	0	0	0	0	0	0	0
ENSGALG00000041679	21	21	28	30	31	22	48	56	54	51	49	66
ENSGALG00000038940	1	2	2	1	1	3	0	2	0	0	2	1
ENSGALG00000015626	212	267	260	267	330	249	259	225	234	211	277	218
ENSGALG00000035367	0	0	0	0	0	0	0	0	0	0	0	0
ENSGALG00000031713	1	1	3	3	3	2	1	0	0	1	1	0
ENSGALG00000033045	15	11	27	32	40	24	12	19	22	4	17	16
ENSGALG00000031699	1279	1545	1635	1581	1894	1494	1584	1455	1360	1291	1624	1475
ENSGALG00000039533	1409	1623	1752	1636	2168	1673	1580	1492	1490	1230	1518	1404
ENSGALG00000039611	192	214	208	154	258	239	620	694	492	467	316	420
ENSGALG00000035611	0	0	0	0	0	0	0	0	0	0	0	0
ENSGALG00000001857	493	596	515	448	588	499	410	443	401	353	420	413
ENSGALG00000033831	0	0	0	0	0	0	0	0	0	1	2	0
ENSGALG00000033338	47	55	50	42	55	44	62	74	62	58	74	62
ENSGALG00000040104	6	5	3	5	15	1	4	3	0	1	4	5
ENSGALG00000014749	525	616	702	593	908	584	995	966	897	732	821	766
ENSGALG00000003397	918	1002	1161	1031	1379	1041	1215	1058	1049	938	1176	1019
ENSGALG00000028456	0	0	0	0	0	0	0	0	0	0	0	0
ENSGALG00000032144	0	0	0	0	0	1	0	0	0	0	0	0
ENSGALG00000023565	0	0	0	0	0	0	0	0	0	0	0	0
ENSGALG00000027165	92	197	94	107	197	108	150	177	122	98	245	152
ENSGALG00000002467	848	1052	866	664	975	963	2092	2457	1755	1621	1271	1284
ENSGALG00000037614	0	0	0	0	0	0	0	0	0	0	0	0
ENSGALG00000039390	3	5	1	3	9	1	3	11	2	6	8	6
ENSGALG00000001177	7	8	15	13	26	13	12	9	15	10	8	10
ENSGALG00000037833	0	0	0	0	0	0	0	0	0	0	0	0
ENSGALG00000039783	628	737	629	635	892	702	889	908	920	738	769	775
ENSGALG00000032602	9	9	9	5	11	21	31	45	44	31	38	48
ENSGALG00000011502	492	516	599	551	806	513	594	537	426	405	480	477
ENSGALG00000030090	0	0	0	0	0	0	0	0	0	0	0	0
ENSGALG00000009916	934	1147	1160	1033	1320	1126	1310	1179	1208	993	1290	1094
ENSGALG00000035716	0	0	0	1	0	0	7	6	6	5	4	5
ENSGALG00000037640	0	0	0	0	0	1	0	0	0	0	0	0
ENSGALG00000006325	2174	2554	2981	2815	3948	2630	5953	6208	5672	4056	4526	3990
ENSGALG00000000377	4838	5633	4885	4736	6274	5781	7346	6868	6889	6098	6804	6179
ENSGALG00000009260	134	187	209	135	223	147	271	246	268	219	213	220
ENSGALG00000037444	2	0	1	2	5	4	1	1	0	1	0	2
ENSGALG00000021542	34	42	38	32	35	41	162	182	150	149	143	116
ENSGALG00000027749	0	0	0	1	0	0	0	0	0	0	0	0
ENSGALG00000034188	63	91	101	72	113	79	46	48	32	40	42	56
ENSGALG00000041825	0	1	2	1	2	0	0	0	0	0	0	0
ENSGALG00000032757	2	5	3	2	8	2	20	27	14	11	16	17
ENSGALG00000032153	1	7	4	2	7	4	29	20	21	27	28	15
ENSGALG00000005277	111	175	157	171	204	160	160	134	159	128	171	174
ENSGALG00000001242	4	9	5	0	6	3	73	88	74	84	65	61
ENSGALG00000040745	139	175	156	133	249	163	182	245	209	156	181	155
ENSGALG00000034018	199	228	225	225	306	246	197	203	164	151	267	183
ENSGALG00000040093	2	0	1	11	6	4	3	1	4	3	3	3
ENSGALG00000032579	0	0	1	0	2	1	0	0	0	0	1	0
ENSGALG00000011889	37	47	35	48	56	48	16	29	22	9	20	12
ENSGALG00000008211	556	670	660	587	828	620	746	787	652	525	715	637
ENSGALG00000037797	8	8	3	8	9	12	12	12	23	28	3	7
ENSGALG00000021174	332	398	434	381	519	354	510	539	543	400	439	408
ENSGALG00000029476	4645	5858	6076	5626	7324	5486	5229	4827	4946	4173	5463	4840
ENSGALG00000038912	0	0	0	0	0	0	0	0	0	0	0	0
ENSGALG00000030960	0	0	2	3	6	3	1	0	2	0	0	2
ENSGALG00000015713	601	680	697	639	910	645	758	724	843	613	755	657
ENSGALG00000029834	24	32	14	23	28	19	42	43	28	15	26	43
ENSGALG00000030634	0	0	0	0	0	0	0	0	0	0	0	0
ENSGALG00000010338	0	1	5	0	0	0	60	51	46	25	41	22
ENSGALG00000026651	65	97	65	60	98	85	302	381	296	233	255	220
ENSGALG00000035018	40	61	60	57	73	50	67	47	55	45	55	38
ENSGALG00000039620	3	10	6	7	8	6	0	3	5	5	5	3
ENSGALG00000005689	6	2	5	5	13	5	1	1	1	3	2	2
ENSGALG00000008648	1467	1770	1921	1770	2300	1725	2440	2558	2577	1936	2333	2138
ENSGALG00000033346	0	1	0	2	0	0	0	2	0	0	0	0
ENSGALG00000041971	0	0	0	0	0	0	0	0	0	0	0	0
ENSGALG00000041617	0	0	0	0	0	0	0	0	0	0	0	0
ENSGALG00000032440	1406	1782	1677	1608	2206	1820	2524	2747	2629	2422	2830	2381
ENSGALG00000011722	5	5	8	11	3	9	18	10	11	10	8	7
ENSGALG00000039999	308	343	321	211	342	377	1798	2366	1837	1517	1060	969
ENSGALG00000034108	0	0	0	0	0	0	0	0	0	0	0	0
ENSGALG00000001616	314	381	399	359	517	381	492	495	476	417	526	489
ENSGALG00000034557	0	0	0	0	0	0	0	0	0	0	0	0
ENSGALG00000009927	3774	4305	4604	4286	5532	4157	4778	4437	4782	3661	4878	4360
ENSGALG00000043581	0	0	1	0	0	3	1	1	1	1	0	3
ENSGALG00000013060	442	504	575	440	547	444	672	567	599	513	644	569
ENSGALG00000041856	0	0	0	0	0	0	0	0	0	0	0	0
ENSGALG00000030852	4	6	13	7	18	13	7	10	14	2	7	8
ENSGALG00000033198	19	25	37	34	54	30	36	33	28	16	27	17
ENSGALG00000019979	680	857	799	754	979	834	1105	1143	1220	1004	1139	971
ENSGALG00000032784	7	6	4	5	11	7	8	3	4	4	0	3
ENSGALG00000008151	1123	1379	1287	1003	1584	1335	3329	3758	3266	2757	2538	2359
ENSGALG00000006329	0	0	1	0	0	0	0	0	0	0	0	0
ENSGALG00000036002	124	147	164	126	223	125	106	88	120	78	71	70
ENSGALG00000001696	14	15	22	21	28	17	19	8	12	3	13	7
ENSGALG00000029707	165	283	191	192	271	216	298	302	237	248	267	276
ENSGALG00000025668	36	35	57	45	59	41	42	17	26	18	28	13
ENSGALG00000030041	4	6	3	4	7	2	1	0	1	2	4	2
ENSGALG00000016709	4	7	9	6	11	3	10	18	10	8	14	16
ENSGALG00000004831	9985	13495	12039	9902	15673	13830	13219	13232	12987	11132	11240	11123
ENSGALG00000007193	113	164	102	104	140	166	300	386	349	289	310	260
ENSGALG00000033141	0	0	0	0	0	0	0	0	0	0	0	0
ENSGALG00000008298	486	938	645	728	1199	943	845	923	873	810	1155	900
ENSGALG00000035680	5	7	8	4	16	7	3	15	7	11	12	14
ENSGALG00000036287	0	2	0	0	1	0	0	0	0	0	0	0
ENSGALG00000031395	0	1	2	3	6	1	3	2	4	1	1	1
ENSGALG00000037712	1	2	2	0	0	1	7	14	15	6	6	8
ENSGALG00000009282	936	1073	1057	995	1400	1051	976	968	762	796	910	802
ENSGALG00000038797	77	71	76	62	83	80	158	147	131	93	108	118
ENSGALG00000029282	1	3	4	1	7	3	25	32	18	18	14	8
ENSGALG00000004574	5	3	10	4	5	4	6	5	5	5	10	4
ENSGALG00000016042	250	370	317	312	393	322	728	648	672	558	637	613
ENSGALG00000040381	3	1	4	1	3	0	1	1	2	1	0	2
ENSGALG00000013180	2	4	3	2	2	1	0	0	0	0	0	0
ENSGALG00000035163	0	0	0	0	0	0	0	0	0	0	0	0
ENSGALG00000032100	0	0	0	0	0	0	0	0	0	0	0	0
ENSGALG00000039231	0	0	0	0	0	0	0	0	0	0	0	0
ENSGALG00000040726	0	0	0	0	0	0	0	0	0	0	0	0
ENSGALG00000010949	137	157	126	224	336	221	94	93	114	75	76	88
ENSGALG00000036659	7	17	9	10	8	19	143	141	131	100	111	92
ENSGALG00000003812	721	822	813	832	1081	910	1152	1099	1150	902	1116	1020
ENSGALG00000006393	10	8	9	5	11	3	5	5	7	3	4	2
ENSGALG00000004812	300	390	307	355	542	370	230	234	192	225	278	240
ENSGALG00000039427	0	0	0	0	0	0	0	0	0	0	0	0
ENSGALG00000025260	1	1	3	6	5	0	1	5	0	1	1	0
ENSGALG00000035348	0	0	0	0	0	0	0	0	0	0	0	0
ENSGALG00000037420	0	0	1	1	2	0	0	0	0	0	0	0
ENSGALG00000038403	12	11	22	14	17	22	0	10	1	7	2	1
ENSGALG00000034869	31	29	17	8	16	32	47	56	30	41	36	34
ENSGALG00000043119	0	0	0	0	0	0	0	0	0	0	0	0
ENSGALG00000039344	3	4	2	6	3	5	5	1	6	3	1	4
ENSGALG00000038759	5	1	3	0	3	1	2	2	4	1	3	1
ENSGALG00000041660	0	0	0	0	0	0	0	0	0	0	0	0
ENSGALG00000014689	37	49	42	56	68	41	45	35	29	21	26	35
ENSGALG00000031441	0	0	0	0	0	0	0	0	0	0	0	0
ENSGALG00000021552	0	0	0	4	0	0	1	2	0	4	2	3
ENSGALG00000041533	124	127	92	71	125	141	354	436	278	289	250	226
ENSGALG00000029442	5	1	8	2	12	4	8	4	6	3	11	6
ENSGALG00000041835	0	0	0	0	0	0	0	0	0	0	0	0
ENSGALG00000040275	73	119	67	70	131	73	130	117	127	75	122	131
ENSGALG00000028691	138	206	169	135	217	164	264	248	220	191	210	224
ENSGALG00000042954	0	0	0	0	1	0	0	0	0	0	0	0
ENSGALG00000041026	61	92	85	72	120	103	41	48	35	40	35	40
ENSGALG00000034656	2	2	0	6	7	4	1	1	1	3	4	2
ENSGALG00000007757	491	557	625	637	886	602	694	709	776	594	641	607
ENSGALG00000001718	4168	4603	4889	4438	6062	4358	5114	4981	4870	4299	4553	4070
ENSGALG00000011389	1256	1480	1789	1812	2419	1573	1130	1028	898	753	914	829
ENSGALG00000032548	0	0	1	0	2	2	0	0	0	0	0	0
ENSGALG00000029403	1	0	0	0	0	0	0	0	0	0	0	0
ENSGALG00000005983	1445	1822	1787	1638	2532	1848	2281	2345	2341	1866	2000	1867
ENSGALG00000002372	513	495	529	463	694	521	852	955	888	680	595	613
ENSGALG00000014297	757	1121	972	735	1251	987	7829	8751	7864	5315	4268	4226
ENSGALG00000026741	419	454	484	477	627	493	504	484	477	435	543	524
ENSGALG00000006609	175	214	168	151	273	235	621	781	545	567	486	446
ENSGALG00000002774	3753	4489	4573	4172	5587	4233	6281	6389	6344	5250	6578	6239
ENSGALG00000035976	4	1	1	5	0	1	0	0	3	0	1	1
ENSGALG00000030628	0	1	0	0	0	0	0	0	0	0	0	0
ENSGALG00000042868	0	0	0	0	0	0	0	0	0	0	0	1
ENSGALG00000029549	0	0	0	2	2	2	2	0	0	0	0	0
ENSGALG00000033476	2	0	0	0	2	0	1	0	0	0	0	0
ENSGALG00000006378	463	546	490	628	926	626	1931	1956	1591	1375	1487	1386
ENSGALG00000026134	1	0	0	2	0	0	3	0	0	0	1	0
ENSGALG00000030804	0	0	0	3	1	1	1	0	0	0	0	1
ENSGALG00000025288	0	0	1	0	1	1	0	0	0	0	1	0
ENSGALG00000031616	0	0	0	0	0	0	0	0	0	0	0	0
ENSGALG00000039008	438	547	494	408	576	494	1220	1324	1277	1113	1220	1114
ENSGALG00000029647	0	0	0	1	0	0	0	0	0	0	0	0
ENSGALG00000041134	0	0	0	0	0	0	0	0	0	0	0	0
ENSGALG00000035299	2025	2308	2187	2258	2887	2362	2608	2552	2785	2134	2616	2520
ENSGALG00000002240	84	116	93	86	109	100	78	79	55	86	67	61
ENSGALG00000042315	0	1	1	1	0	3	2	0	0	1	0	5
ENSGALG00000006040	246	307	355	237	370	313	789	894	683	640	565	555
ENSGALG00000040149	73	87	87	70	79	80	201	227	176	175	179	179
ENSGALG00000012488	182	235	216	192	249	234	636	655	568	515	501	514
ENSGALG00000007714	4	5	1	4	7	5	6	10	6	5	3	3
ENSGALG00000037143	0	0	0	0	0	0	0	0	0	0	0	0
ENSGALG00000037727	121	129	109	111	143	122	202	240	158	182	218	191
ENSGALG00000017447	1484	1656	1786	1619	2238	1625	1689	1719	1745	1446	1659	1642
ENSGALG00000040052	19	21	17	12	21	37	136	168	113	85	120	107
ENSGALG00000012869	9	3	6	11	13	11	3	1	7	0	4	2
ENSGALG00000010411	3238	3880	3908	3703	5053	3751	3906	3752	3957	3308	4266	3716
ENSGALG00000035366	0	0	0	0	0	0	0	0	0	0	0	0
ENSGALG00000038478	0	0	0	0	0	0	0	0	0	0	0	0
ENSGALG00000031477	0	0	0	0	0	0	0	0	0	0	0	0
ENSGALG00000037261	258	294	251	228	330	300	505	455	485	411	435	415
ENSGALG00000037897	95	102	101	77	146	99	81	89	92	66	110	76
ENSGALG00000041136	0	0	0	0	0	1	0	0	0	0	0	0
ENSGALG00000042457	0	0	0	0	0	0	0	0	0	0	0	0
ENSGALG00000037458	0	0	0	0	0	0	0	0	0	0	0	0
ENSGALG00000039687	0	1	0	2	2	4	1	4	1	1	1	4
ENSGALG00000012792	1538	1802	1838	1655	2446	1694	1754	1714	1510	1346	1186	1234
ENSGALG00000001289	71	105	94	82	98	130	752	849	709	559	537	447
ENSGALG00000009846	463	604	537	528	743	508	638	610	664	492	771	602
ENSGALG00000039187	2	3	0	0	0	0	1	4	1	0	0	0
ENSGALG00000004978	325	317	309	298	411	324	706	796	618	549	542	526
ENSGALG00000031019	2	1	2	0	1	0	0	0	1	0	0	0
ENSGALG00000028573	0	0	0	0	0	0	0	0	0	0	0	0
ENSGALG00000038564	0	0	0	0	0	0	0	0	0	0	0	0
ENSGALG00000007140	7398	8020	9199	7801	10602	8077	9691	9583	8237	8022	8373	7806
ENSGALG00000035154	70	71	66	52	76	73	51	37	45	42	44	43
ENSGALG00000015375	2	12	4	5	10	6	17	10	8	6	6	15
ENSGALG00000002112	88	107	95	83	105	145	241	318	257	214	214	201
ENSGALG00000000357	371	353	277	334	530	425	93	121	75	66	106	72
ENSGALG00000015362	0	1	0	1	0	0	0	0	1	0	0	1
ENSGALG00000025924	0	0	0	0	1	1	20	16	21	7	11	9
ENSGALG00000008569	1739	2032	1987	1911	2478	1919	2588	2662	2768	2245	2737	2464
ENSGALG00000019797	7	4	6	8	9	2	7	4	3	0	2	3
ENSGALG00000016501	935	1175	1176	1122	1546	1228	1505	1514	1641	1271	1539	1458
ENSGALG00000042810	14	44	26	24	51	31	27	23	20	31	23	48
ENSGALG00000002816	682	780	606	725	1029	874	510	659	470	325	511	392
ENSGALG00000009209	2	0	0	1	0	0	0	0	0	0	0	1
ENSGALG00000035303	0	0	0	0	0	0	0	0	0	0	0	0
ENSGALG00000039047	55	61	62	57	76	39	85	79	90	67	98	66
ENSGALG00000043027	47	58	77	79	105	73	64	73	63	41	51	45
ENSGALG00000000636	1654	1925	2180	1894	2654	2024	1638	1547	1288	1267	1423	1326
ENSGALG00000030490	1	0	0	0	0	0	0	1	1	0	0	0
ENSGALG00000029437	0	7	1	4	6	3	1	4	0	3	3	5
ENSGALG00000000764	1825	2295	2149	1742	2692	2214	2707	2907	2662	2482	2499	2386
ENSGALG00000030109	4	19	12	9	13	19	6	13	15	5	8	10
ENSGALG00000039379	9	17	10	7	14	12	16	28	11	16	8	8
ENSGALG00000032228	0	0	0	0	0	0	0	0	0	0	0	0
ENSGALG00000041143	1	0	0	1	0	1	1	0	0	2	0	1
ENSGALG00000014426	1324	1543	1768	1616	2106	1525	1670	1730	1644	1355	1559	1363
ENSGALG00000008153	69	96	90	112	173	92	177	155	203	123	92	100
ENSGALG00000043657	0	0	1	1	1	1	0	0	0	0	0	0
ENSGALG00000035146	0	0	0	0	0	0	0	0	0	0	0	0
ENSGALG00000012732	21	17	27	27	34	19	21	13	13	10	16	23
ENSGALG00000032857	0	0	0	1	0	0	0	0	0	0	0	0
ENSGALG00000039806	51	42	62	66	84	60	28	24	27	25	12	19
ENSGALG00000041754	151	180	128	94	157	194	1093	1171	1018	817	733	660
ENSGALG00000010169	8	10	8	11	9	15	10	10	7	11	10	6
ENSGALG00000001042	732	913	879	744	992	843	1028	1076	805	787	789	739
ENSGALG00000033556	0	0	0	0	0	0	0	0	0	0	0	0
ENSGALG00000011934	339	400	440	369	518	407	516	577	519	444	523	453
ENSGALG00000042189	4	13	13	8	10	6	2	2	2	3	5	4
ENSGALG00000041295	1	1	1	0	0	2	7	9	1	2	1	3
ENSGALG00000013149	30	48	35	40	64	42	37	51	35	35	41	35
ENSGALG00000030232	0	0	0	0	0	0	0	0	0	0	0	0
ENSGALG00000014923	63	67	67	61	119	64	101	109	92	83	98	131
ENSGALG00000041457	0	0	0	0	0	0	0	0	0	0	0	0
ENSGALG00000032075	0	0	0	0	0	0	0	0	0	0	0	0
ENSGALG00000003470	1	1	7	3	7	1	3	6	4	4	2	2
ENSGALG00000041657	8	12	22	23	36	30	10	9	14	8	9	10
ENSGALG00000027334	626	788	867	779	1092	778	849	914	923	664	761	775
ENSGALG00000039867	0	0	0	0	0	0	0	0	1	0	0	0
ENSGALG00000035725	0	0	1	9	10	7	2	2	2	0	0	1
ENSGALG00000031174	0	0	0	0	0	0	0	0	0	0	0	0
ENSGALG00000005814	4	4	2	4	2	7	11	17	3	8	11	8
ENSGALG00000043120	0	0	0	0	0	0	0	1	0	0	0	0
ENSGALG00000003832	396	483	401	329	455	520	1673	2035	1696	1413	1288	1310
ENSGALG00000035784	5	6	6	3	2	4	1	3	0	0	0	1
ENSGALG00000016702	233	472	290	348	631	227	592	356	331	229	411	486
ENSGALG00000039941	0	0	0	0	0	0	0	0	0	0	0	0
ENSGALG00000040887	25	50	50	47	43	36	51	38	42	47	44	40
ENSGALG00000032101	0	0	0	0	0	0	0	0	0	0	0	0
ENSGALG00000026137	269	273	339	256	347	350	3478	4857	3550	3486	3180	2575
ENSGALG00000031294	77	115	130	107	136	111	135	130	145	118	137	138
ENSGALG00000031394	0	0	0	0	1	0	0	0	0	0	1	0
ENSGALG00000010177	2015	2440	2667	2448	3311	2512	2823	2768	2201	2052	2435	2063
ENSGALG00000034187	2497	2884	2754	2428	3288	2673	3391	3396	3073	2703	2885	2898
ENSGALG00000039532	71	60	49	38	42	87	452	551	505	341	257	307
ENSGALG00000032320	8	9	12	7	8	6	4	3	3	6	7	3
ENSGALG00000035186	0	2	0	0	0	0	0	0	1	1	1	0
ENSGALG00000029852	0	0	0	0	0	0	0	0	0	0	0	0
ENSGALG00000039514	1	1	0	1	2	0	3	1	1	1	4	1
ENSGALG00000025410	0	1	0	0	0	0	0	0	0	0	0	0
ENSGALG00000003377	175	238	212	204	297	244	305	318	290	223	231	223
ENSGALG00000021949	0	0	0	0	0	0	0	0	0	0	0	0
ENSGALG00000039310	146	134	176	182	198	150	136	115	125	88	107	84
ENSGALG00000030898	17	23	13	19	32	42	2249	2679	1085	1846	1492	1194
ENSGALG00000011330	30571	35928	35518	33274	46108	33982	24075	21905	17564	19464	22228	20239
ENSGALG00000040581	3122	4163	3698	3035	4401	3600	3197	3228	3065	2797	3965	3296
ENSGALG00000007680	18	21	14	25	32	19	36	41	38	27	36	33
ENSGALG00000042194	0	0	0	0	0	0	0	0	0	0	0	0
ENSGALG00000005414	408	430	449	388	593	526	567	545	537	499	451	497
ENSGALG00000039384	63	80	65	46	71	73	141	146	116	138	133	115
ENSGALG00000041089	29	25	21	11	14	28	30	28	18	19	18	13
ENSGALG00000001073	34	60	66	64	76	55	95	116	94	86	93	82
ENSGALG00000036000	0	0	0	0	0	0	0	0	0	0	0	0
ENSGALG00000015082	11696	15088	13966	12462	18574	14961	12201	11862	12434	10233	11420	11318
ENSGALG00000029362	0	0	0	0	0	0	0	0	0	0	0	0
ENSGALG00000006563	3373	3825	4009	3585	4477	3492	4596	4302	4179	3758	3973	4165
ENSGALG00000001376	214	290	269	172	261	222	479	523	346	307	324	317
ENSGALG00000026920	0	0	0	0	0	0	0	0	0	0	0	0
ENSGALG00000015808	238	285	320	306	434	313	412	397	421	267	404	317
ENSGALG00000029755	0	0	0	0	0	0	0	0	0	0	0	0
ENSGALG00000030237	178	176	166	148	311	226	666	712	644	531	443	439
ENSGALG00000038522	553	581	537	379	696	682	1850	2317	1506	1444	1186	1127
ENSGALG00000034644	0	0	0	0	0	0	0	0	0	0	0	0
ENSGALG00000014106	5522	7142	6636	6002	8198	6694	5980	5874	5000	5315	6179	5572
ENSGALG00000020895	26	25	18	26	24	12	15	16	16	20	22	26
ENSGALG00000028203	2260	2631	3034	2745	3637	2798	4377	4443	4512	3237	4188	3683
ENSGALG00000039702	0	0	0	1	0	0	0	0	0	0	0	0
ENSGALG00000001328	10355	12123	10497	8686	12247	12220	20635	21520	20103	18191	19140	17924
ENSGALG00000031824	9	4	5	2	8	12	227	259	175	168	152	143
ENSGALG00000034828	0	0	0	0	0	0	0	0	0	0	0	0
ENSGALG00000035347	0	0	0	0	0	0	0	0	0	0	0	0
ENSGALG00000028284	15129	17850	15319	12730	19110	19444	32520	35998	33321	26254	27606	24245
ENSGALG00000035100	0	0	0	0	0	0	0	0	0	0	0	0
ENSGALG00000011427	504	631	714	638	871	664	701	740	625	544	615	561
ENSGALG00000033907	4	2	5	6	4	0	1	3	4	1	2	0
ENSGALG00000003287	232	314	314	298	436	273	340	331	319	256	225	223
ENSGALG00000037486	604	722	586	501	749	837	6079	6622	5842	4728	4291	4004
ENSGALG00000035282	209	289	263	219	286	240	475	490	438	436	367	325
ENSGALG00000036709	0	0	0	0	0	0	0	0	0	0	0	0
ENSGALG00000030916	0	0	0	0	0	0	0	0	0	0	0	0
ENSGALG00000031266	21	27	20	30	44	21	36	20	28	10	27	28
ENSGALG00000041354	5	7	9	4	9	5	3	1	1	2	1	1
ENSGALG00000033852	0	0	0	0	0	0	0	0	0	0	0	0
ENSGALG00000031980	60	72	54	33	58	96	380	452	311	342	341	301
ENSGALG00000029606	221	332	246	218	349	195	426	280	298	202	228	301
ENSGALG00000031726	275	369	260	212	330	380	1373	1555	1270	1073	1087	922
ENSGALG00000026801	0	0	0	0	0	0	0	0	0	0	0	0
ENSGALG00000000808	2	8	5	8	11	3	1	0	0	1	2	0
ENSGALG00000040823	345	406	440	401	597	443	499	503	491	396	543	465
ENSGALG00000042005	172	153	95	94	125	190	1134	1316	1157	982	640	688
ENSGALG00000043643	1	1	0	0	1	0	12	9	4	7	12	6
ENSGALG00000032599	808	992	991	793	1127	932	1284	1377	1039	944	987	958
ENSGALG00000038587	19	42	17	18	37	41	75	95	48	52	50	60
ENSGALG00000043217	1	0	1	2	3	0	0	0	0	0	0	0
ENSGALG00000007479	310	460	435	312	500	426	792	824	695	525	537	522
ENSGALG00000040870	1	0	1	1	2	0	0	0	0	0	1	0
ENSGALG00000039370	1	0	0	0	0	0	0	0	0	0	0	0
ENSGALG00000039471	0	0	0	0	0	0	0	0	0	0	0	0
ENSGALG00000033130	0	0	0	0	0	0	0	0	0	0	0	0
ENSGALG00000023354	3	1	0	0	2	1	12	21	13	9	3	8
ENSGALG00000034679	41	53	41	28	52	60	650	720	488	465	412	386
ENSGALG00000034881	1	0	1	3	4	1	0	0	1	0	0	0
ENSGALG00000015398	1	0	0	0	0	0	0	1	0	0	0	0
ENSGALG00000039838	0	0	0	0	0	0	0	0	2	0	1	0
ENSGALG00000008443	5943	7604	7469	6117	9021	7552	10060	11105	9907	8922	9328	8608
ENSGALG00000030376	755	806	896	622	834	762	1854	1875	1780	1706	1765	1749
ENSGALG00000036734	138	191	76	69	106	171	590	698	473	458	330	370
ENSGALG00000025230	0	0	0	0	0	0	0	0	0	0	0	0
ENSGALG00000028260	0	0	0	0	0	0	0	0	0	1	0	0
ENSGALG00000033677	1263	1730	1487	1505	2117	1505	1644	1560	1615	1293	1589	1626
ENSGALG00000025175	0	0	0	0	0	1	0	0	0	0	0	0
ENSGALG00000032833	0	0	0	0	1	1	2	4	1	4	3	0
ENSGALG00000006642	11	11	14	18	30	21	12	11	15	8	12	12
ENSGALG00000033818	74	74	46	60	76	96	280	241	287	172	272	282
ENSGALG00000037540	917	1145	1067	914	1357	1054	1587	1875	1544	1308	1466	1323
ENSGALG00000032480	0	0	0	0	0	0	0	0	0	0	0	0
ENSGALG00000037600	0	0	0	0	0	0	0	0	0	0	0	0
ENSGALG00000008969	13	10	10	13	14	6	8	8	8	3	9	1
ENSGALG00000035173	94	122	78	48	107	113	420	538	448	380	303	276
ENSGALG00000039304	5	10	7	5	6	9	10	5	5	4	6	7
ENSGALG00000009520	52	67	54	90	95	67	104	90	77	39	74	65
ENSGALG00000028568	233	284	263	277	384	289	266	244	246	206	319	233
ENSGALG00000034732	0	0	0	0	0	0	0	0	0	0	0	0
ENSGALG00000008400	1136	1380	1333	1139	1567	1344	1528	1477	1420	1304	1619	1390
ENSGALG00000038249	269	303	258	239	322	288	374	354	320	282	258	217
ENSGALG00000001592	3	7	8	6	7	8	7	6	1	4	1	5
ENSGALG00000033937	1	1	5	3	2	3	1	1	0	0	0	0
ENSGALG00000031645	0	0	0	0	3	0	0	0	0	0	0	0
ENSGALG00000031383	0	0	0	0	0	0	0	0	0	0	0	0
ENSGALG00000035772	218	322	319	220	359	303	313	326	293	274	316	267
ENSGALG00000030859	1305	1548	1544	1621	2097	1580	2034	1974	2109	1643	1868	1831
ENSGALG00000033425	2	4	1	1	2	2	2	2	2	1	0	0
ENSGALG00000037646	1005	1239	1255	1135	1564	1274	1670	1728	1577	1245	1232	1269
ENSGALG00000008275	0	0	0	0	0	0	0	0	0	0	0	0
ENSGALG00000036833	1124	1384	1460	1459	1986	1353	1338	1406	1154	1091	1285	1123
ENSGALG00000000451	0	1	2	0	3	4	1	2	1	0	0	0
ENSGALG00000005852	2	1	2	1	2	2	6	14	15	6	7	8
ENSGALG00000005722	447	582	617	552	753	563	654	677	607	503	559	538
ENSGALG00000000761	616	736	768	787	1097	715	835	874	829	605	699	732
ENSGALG00000034990	26	68	46	45	59	39	40	25	24	20	37	28
ENSGALG00000030815	0	1	0	2	3	1	4	1	0	0	1	2
ENSGALG00000037890	428	488	488	341	554	503	1026	1206	982	885	812	748
ENSGALG00000034056	0	0	0	0	0	0	0	0	0	0	0	0
ENSGALG00000013022	1859	2064	2324	1791	2707	1919	1486	1657	1101	1211	1183	1062
ENSGALG00000035478	654	676	770	736	993	751	685	696	625	571	671	667
ENSGALG00000035575	469	517	627	570	674	514	853	874	866	705	758	687
ENSGALG00000042101	1503	1773	2056	1960	2663	1741	1436	1502	1343	1086	1238	1179
ENSGALG00000002878	306	331	332	343	518	329	317	309	268	219	270	249
ENSGALG00000036414	0	0	0	0	0	0	0	0	0	0	0	0
ENSGALG00000032818	91	102	130	103	166	86	41	52	42	41	31	34
ENSGALG00000034089	3	0	0	0	0	3	35	44	22	17	20	26
ENSGALG00000043530	11	7	10	10	5	4	8	14	14	9	3	7
ENSGALG00000026449	30	50	24	26	71	52	1389	1760	1134	1233	974	825
ENSGALG00000033957	613	753	643	494	842	794	1351	1370	1129	995	893	933
ENSGALG00000040789	4	3	2	2	2	1	0	2	2	0	3	2
ENSGALG00000031188	0	0	0	0	0	0	0	0	0	0	0	0
ENSGALG00000042392	0	2	4	3	2	2	0	0	0	0	0	0
ENSGALG00000015382	4	15	9	7	12	4	3	2	6	4	0	1
ENSGALG00000029212	63	77	110	60	86	64	55	55	37	36	25	31
ENSGALG00000040337	21	36	36	30	30	34	40	27	12	20	28	26
ENSGALG00000033941	0	1	0	1	4	0	13	12	6	4	3	10
ENSGALG00000013039	523	662	623	586	851	677	1159	1192	1144	1002	1156	1058
ENSGALG00000002496	2	0	1	0	0	3	0	1	0	0	1	0
ENSGALG00000015702	497	635	603	528	776	607	490	531	471	461	568	491
ENSGALG00000033900	0	0	0	0	0	0	0	0	0	0	0	0
ENSGALG00000003433	11	7	6	12	8	3	2	3	4	3	6	2
ENSGALG00000032785	0	0	0	0	0	0	0	0	0	0	0	0
ENSGALG00000004728	944	1306	1244	1177	1695	1201	1575	1577	1424	1381	1598	1442
ENSGALG00000043190	10	19	30	22	44	17	16	26	21	13	16	16
ENSGALG00000033969	0	0	0	0	0	0	0	0	0	0	0	0
ENSGALG00000013143	266	302	292	299	440	329	318	381	275	252	344	261
ENSGALG00000031016	319	367	370	373	548	356	372	376	304	318	297	340
ENSGALG00000013715	2491	3052	3546	2879	4242	3142	3991	3946	3497	2989	3249	3100
ENSGALG00000043116	0	0	0	0	0	0	0	0	0	0	0	0
ENSGALG00000035540	1	4	2	0	7	1	2	5	3	2	1	0
ENSGALG00000027586	1	0	0	0	0	0	1	0	0	0	0	0
ENSGALG00000037032	0	0	0	0	0	0	0	0	0	0	0	0
ENSGALG00000040784	142	206	139	131	189	182	318	363	263	291	265	234
ENSGALG00000039065	1	2	1	1	7	1	4	1	0	2	2	1
ENSGALG00000027000	0	0	0	0	1	1	0	1	0	0	0	0
ENSGALG00000035321	10	6	4	6	9	4	0	0	0	1	1	0
ENSGALG00000004249	57	54	43	65	79	49	31	31	46	26	23	29
ENSGALG00000041852	0	0	0	0	0	0	0	0	0	0	0	0
ENSGALG00000039978	0	1	2	0	2	2	1	1	0	2	1	1
ENSGALG00000033034	2	0	0	0	0	0	2	4	3	2	2	0
ENSGALG00000042600	5	1	6	3	5	4	16	7	8	7	6	8
ENSGALG00000042274	0	0	0	0	1	0	0	0	0	0	0	0
ENSGALG00000007038	15	19	13	11	17	9	30	33	46	19	20	20
ENSGALG00000038025	1	3	3	2	0	1	2	1	0	0	1	3
ENSGALG00000032593	24	50	48	38	63	28	37	38	31	25	35	27
ENSGALG00000031257	10	11	16	6	11	7	8	4	4	5	8	4
ENSGALG00000007687	1245	1505	1653	1453	1937	1625	2084	2177	2026	1725	2134	1812
ENSGALG00000030047	190	224	235	235	317	183	248	179	208	143	238	219
ENSGALG00000001780	12	13	6	13	22	11	9	18	8	10	4	13
ENSGALG00000041203	141	158	171	178	203	162	484	520	435	373	380	404
ENSGALG00000031065	0	0	0	0	0	0	0	1	0	0	0	1
ENSGALG00000039439	0	0	1	1	1	0	0	0	0	0	0	0
ENSGALG00000043273	0	0	0	0	0	0	0	0	0	0	0	0
ENSGALG00000031328	177	230	172	127	185	217	1046	1129	972	773	621	675
ENSGALG00000006437	392	449	542	529	675	486	411	373	432	350	351	353
ENSGALG00000040421	920	1049	1079	1051	1360	1054	1254	1196	1285	963	1305	1113
ENSGALG00000034109	41	47	52	56	101	70	47	52	52	42	50	42
ENSGALG00000030451	1	4	2	4	3	3	2	0	2	2	1	0
ENSGALG00000005340	211	241	312	266	361	250	276	240	260	202	265	225
ENSGALG00000033108	0	0	0	0	0	0	0	0	0	0	0	0
ENSGALG00000042472	2	3	4	4	6	4	2	4	5	2	1	4
ENSGALG00000042019	0	0	0	0	0	0	0	0	0	0	0	0
ENSGALG00000035481	0	0	0	0	0	0	0	0	0	0	0	0
ENSGALG00000043506	3	4	3	5	7	7	4	5	7	5	1	7
ENSGALG00000043007	0	0	0	0	0	0	0	0	0	0	0	0
ENSGALG00000014218	2	1	4	4	4	0	0	0	2	0	2	2
ENSGALG00000042649	0	0	0	0	0	0	0	0	0	0	0	0
ENSGALG00000037505	5	1	6	7	11	7	2	0	3	3	1	0
ENSGALG00000012739	3209	3764	4387	3912	5588	3657	3305	3398	2707	2484	2859	2408
ENSGALG00000042357	1005	1200	1394	1133	1635	1213	1271	1292	1097	1044	961	1001
ENSGALG00000025245	3	4	1	0	1	7	1	0	0	0	0	0
ENSGALG00000042168	21	12	23	14	18	8	11	19	13	7	13	15
ENSGALG00000004832	45	44	27	29	69	55	188	178	145	127	136	102
ENSGALG00000039958	766	890	881	920	1213	907	1271	1122	1241	912	1109	1097
ENSGALG00000029195	19	26	34	13	27	27	15	11	10	5	11	10
ENSGALG00000014800	2632	3276	3218	3165	4479	3300	3808	3936	3833	2944	3625	3341
ENSGALG00000025578	0	0	0	0	0	0	0	0	0	0	0	0
ENSGALG00000010577	6	5	8	5	12	11	8	5	2	3	5	0
ENSGALG00000004300	334	364	421	374	523	379	383	359	328	331	374	354
ENSGALG00000029203	0	0	0	0	0	0	0	0	0	0	0	0
ENSGALG00000036730	469	641	666	670	938	609	679	593	699	492	678	709
ENSGALG00000015889	1532	1685	1791	1746	2323	1679	1496	1370	1149	1131	1328	1077
ENSGALG00000043730	0	0	0	0	0	0	0	0	0	0	0	0
ENSGALG00000011019	1345	1503	1597	1355	1964	1477	1893	2133	1788	1660	1844	1677
ENSGALG00000029715	0	0	0	0	0	0	0	0	0	0	0	0
ENSGALG00000030423	0	1	0	0	0	0	0	0	0	0	0	0
ENSGALG00000041270	2	2	1	1	5	1	2	0	1	0	1	1
ENSGALG00000013187	1690	1990	1996	1974	2563	1911	2294	2155	2234	1917	2479	2035
ENSGALG00000031507	28	24	29	27	32	38	44	42	30	37	57	56
ENSGALG00000037253	7	8	5	20	14	17	9	9	5	6	0	2
ENSGALG00000009463	397	377	421	412	626	429	655	642	590	481	468	507
ENSGALG00000030349	1	0	0	3	5	4	0	0	0	0	0	0
ENSGALG00000002012	35	34	31	43	45	23	7	9	2	8	6	2
ENSGALG00000034365	0	0	1	0	1	1	0	0	0	0	0	0
ENSGALG00000032342	210	238	253	219	313	238	296	379	228	261	307	261
ENSGALG00000005575	2725	3391	3441	3012	4324	3414	3205	2985	2856	2555	2716	2602
ENSGALG00000035385	1	0	2	0	0	0	0	0	0	0	2	0
ENSGALG00000004781	68	85	87	66	104	76	104	88	71	78	53	53
ENSGALG00000000478	86	114	93	71	112	110	122	114	89	83	99	85
ENSGALG00000006418	3431	4098	4359	4208	5758	3973	3215	3107	3097	2635	3120	2911
ENSGALG00000042956	0	0	0	0	0	0	0	0	0	0	0	0
ENSGALG00000012968	433	551	584	565	718	557	605	556	615	430	572	522
ENSGALG00000036677	2180	2517	2251	2396	3075	2486	2358	2253	1990	1992	2452	2146
ENSGALG00000039112	0	0	0	0	0	0	0	0	0	0	0	0
ENSGALG00000010553	777	962	892	915	1256	962	1058	991	1071	841	1113	972
ENSGALG00000043495	0	0	0	0	0	0	0	1	0	0	2	0
ENSGALG00000036741	203	304	303	299	365	215	229	238	241	151	236	225
ENSGALG00000039398	0	0	0	0	0	0	0	0	0	0	0	0
ENSGALG00000026346	0	0	1	0	0	0	0	0	0	0	0	0
ENSGALG00000004640	379	470	549	462	699	476	655	712	669	481	562	519
ENSGALG00000033229	13	8	7	3	14	20	59	66	40	41	39	35
ENSGALG00000030254	26	30	24	31	34	34	56	55	47	34	36	47
ENSGALG00000004248	7	7	8	3	5	5	5	7	3	3	1	3
ENSGALG00000010371	520	525	580	563	731	512	531	517	439	447	507	481
ENSGALG00000013603	11	12	12	15	19	16	2	9	0	2	4	1
ENSGALG00000043501	3	2	5	0	2	4	0	0	0	0	1	0
ENSGALG00000038623	0	3	1	4	3	1	1	0	0	1	2	0
ENSGALG00000027258	201	279	301	275	310	247	298	301	324	254	296	264
ENSGALG00000033157	828	956	829	524	942	996	2199	2619	1868	2130	1997	1771
ENSGALG00000037393	0	0	3	2	5	1	3	0	3	1	0	1
ENSGALG00000034653	2	3	1	4	7	2	0	0	1	1	1	0
ENSGALG00000036758	0	0	0	0	0	0	0	0	0	0	0	0
ENSGALG00000016176	16	32	40	22	43	30	23	26	24	19	34	24
ENSGALG00000035231	7	7	5	9	9	4	2	2	3	5	1	4
ENSGALG00000006951	3	8	7	4	7	1	8	8	4	2	7	3
ENSGALG00000025506	6	6	3	5	10	3	4	6	0	2	1	6
ENSGALG00000035169	45	52	55	53	58	56	78	87	72	51	67	62
ENSGALG00000042289	3	4	5	0	5	3	3	6	2	3	7	8
ENSGALG00000030673	7	15	12	12	15	9	17	27	13	16	13	17
ENSGALG00000042118	0	0	0	0	0	0	3	0	0	0	0	0
ENSGALG00000035798	0	3	0	1	0	0	0	0	0	1	1	0
ENSGALG00000040551	0	0	1	0	0	0	0	0	0	0	0	0
ENSGALG00000041489	1	0	0	0	1	0	0	0	0	0	0	0
ENSGALG00000003574	982	1159	1126	1109	1475	1046	1275	1289	1266	1034	1417	1186
ENSGALG00000031288	1	0	0	1	1	4	1	0	0	0	1	0
ENSGALG00000042621	3	3	5	11	5	3	6	4	7	0	6	1
ENSGALG00000036678	497	572	640	491	771	685	1174	1471	1121	1020	964	876
ENSGALG00000026865	142	181	151	155	230	157	191	167	160	121	175	166
ENSGALG00000030686	0	0	0	0	0	0	0	0	0	0	0	0
ENSGALG00000021143	54	51	49	78	114	58	65	89	54	33	72	57
ENSGALG00000039881	0	0	0	0	0	0	0	0	0	0	0	0
ENSGALG00000037084	21	8	22	10	24	19	19	26	17	16	20	8
ENSGALG00000042640	0	0	0	0	0	0	0	0	0	0	0	0
ENSGALG00000038962	0	0	0	0	0	0	0	0	1	0	0	1
ENSGALG00000007543	67	74	48	34	68	69	172	224	168	170	139	173
ENSGALG00000035828	2	5	6	3	2	3	12	4	2	4	6	5
ENSGALG00000037689	0	0	0	0	0	1	8	18	6	10	16	22
ENSGALG00000003103	142	162	107	84	121	212	1073	1271	927	758	607	578
ENSGALG00000038698	0	0	0	0	0	0	0	0	0	0	0	0
ENSGALG00000012059	617	816	733	723	1025	696	695	742	626	588	643	601
ENSGALG00000032114	14	12	24	10	28	17	21	19	18	14	14	10
ENSGALG00000013090	0	4	4	2	3	4	18	17	14	11	2	3
ENSGALG00000040170	0	0	0	0	0	0	0	0	0	0	0	0
ENSGALG00000010246	2223	2619	2447	2427	3240	2655	1852	1763	1715	1587	2105	1790
ENSGALG00000018976	448	433	487	485	664	408	743	742	763	604	753	592
ENSGALG00000033110	479	517	422	334	510	528	2368	2972	2358	2012	1798	1528
ENSGALG00000006445	1895	2322	2410	2162	3052	2461	2211	2243	1864	1730	1875	1856
ENSGALG00000027935	0	0	0	0	0	0	0	0	0	0	0	0
ENSGALG00000016630	819	980	1000	831	1320	940	1360	1446	1237	1159	1183	1170
ENSGALG00000041741	0	0	0	0	0	0	0	0	0	0	0	0
ENSGALG00000001597	998	1160	1008	903	1252	1134	2716	2982	2908	2253	2575	2236
ENSGALG00000039004	1	0	0	0	1	1	0	0	0	0	0	0
ENSGALG00000030370	0	0	0	0	0	0	0	0	0	0	0	0
ENSGALG00000034460	5	4	4	2	2	5	254	271	210	208	134	177
ENSGALG00000009241	247	341	273	187	367	244	443	440	360	380	380	393
ENSGALG00000039894	4	4	4	6	10	9	6	3	4	2	2	5
ENSGALG00000002847	577	655	681	522	753	667	1984	1949	1742	1542	1507	1344
ENSGALG00000025263	0	0	0	0	0	0	0	0	0	0	0	0
ENSGALG00000027262	936	1046	1114	1065	1390	1019	1170	1074	1091	862	1199	1063
ENSGALG00000004882	399	473	524	484	642	480	1665	1903	1557	1395	1089	1014
ENSGALG00000043435	0	0	0	0	2	0	16	13	7	4	4	2
ENSGALG00000034080	0	0	0	0	0	0	0	0	0	0	0	0
ENSGALG00000042814	871	977	767	673	999	1064	2487	2798	2432	2030	2156	1970
ENSGALG00000042517	2435	2613	3205	2662	3548	2618	2803	2515	3045	2050	2203	2146
ENSGALG00000035873	12	11	9	13	21	23	14	3	1	2	4	2
ENSGALG00000010820	125	114	76	111	194	129	94	177	159	53	148	82
ENSGALG00000013853	1355	1514	1571	1652	2050	1563	2195	2196	2036	1688	1946	1764
ENSGALG00000028157	1	2	0	0	0	1	0	0	1	1	0	3
ENSGALG00000030498	67	90	77	61	100	62	35	46	31	31	55	41
ENSGALG00000040261	20	30	19	21	26	24	30	28	11	18	15	14
ENSGALG00000015687	57	56	49	57	92	50	48	41	42	42	44	57
ENSGALG00000043502	4	0	1	3	2	0	0	0	0	0	0	1
ENSGALG00000032720	0	1	0	1	2	1	1	1	1	1	0	0
ENSGALG00000033518	0	0	0	0	0	0	0	0	0	0	0	0
ENSGALG00000017132	827	931	991	986	1291	940	731	687	622	544	672	648
ENSGALG00000040984	0	0	0	0	0	0	0	0	0	0	0	0
ENSGALG00000042558	4	4	8	3	9	5	3	0	5	5	1	1
ENSGALG00000036325	0	0	1	1	0	0	0	0	0	0	0	0
ENSGALG00000007986	167	212	242	198	241	207	431	458	450	303	301	317
ENSGALG00000040821	0	0	0	2	0	0	0	0	1	1	2	1
ENSGALG00000008572	2016	2440	2493	2318	3102	2255	1904	1775	1772	1510	1870	1704
ENSGALG00000031915	0	0	0	0	0	0	0	0	0	0	0	0
ENSGALG00000031211	0	0	1	0	0	2	10	12	9	4	8	11
ENSGALG00000032273	1097	1334	1412	1287	1842	1415	1727	1751	1673	1392	1355	1355
ENSGALG00000007882	175	243	189	167	260	252	374	401	368	310	400	359
ENSGALG00000000158	41	52	40	33	52	58	74	97	71	86	69	67
ENSGALG00000015274	736	849	860	836	1069	889	1056	1141	1180	941	1112	1040
ENSGALG00000040932	0	0	0	0	0	0	0	0	0	0	0	0
ENSGALG00000027444	210	269	292	285	383	305	295	302	218	230	270	234
ENSGALG00000039515	0	0	0	0	0	0	0	0	0	0	0	0
ENSGALG00000025452	0	2	0	2	0	0	0	0	0	0	1	0
ENSGALG00000036001	411	491	477	462	575	468	619	576	565	461	629	567
ENSGALG00000029571	122	158	161	141	183	150	163	188	161	145	200	161
ENSGALG00000001534	3	10	3	4	1	4	5	5	2	5	6	5
ENSGALG00000030405	0	0	0	0	0	0	0	0	0	0	0	0
ENSGALG00000041130	2	0	1	0	3	2	0	1	1	1	1	1
ENSGALG00000001647	217	257	221	181	283	273	324	397	309	237	239	225
ENSGALG00000040564	0	0	0	0	0	0	0	0	0	0	0	0
ENSGALG00000008405	2002	2249	2177	2178	2942	2331	3129	3353	3231	2694	3027	2709
ENSGALG00000005279	170	268	268	236	310	210	300	291	207	217	267	245
ENSGALG00000005831	8	11	12	10	24	14	28	18	21	13	16	17
ENSGALG00000005788	1056	1275	1309	1188	1670	1260	1348	1373	1132	1010	1120	1072
ENSGALG00000004687	80	109	97	94	112	109	141	160	98	124	146	130
ENSGALG00000021079	19	27	10	23	21	44	98	162	104	87	75	84
ENSGALG00000038371	0	0	0	0	0	0	0	0	0	0	0	0
ENSGALG00000026944	655	733	665	563	819	856	1991	2217	2140	1711	1617	1522
ENSGALG00000031084	0	1	1	0	2	2	1	2	0	6	3	1
ENSGALG00000027315	67	85	98	82	118	87	179	177	178	128	122	146
ENSGALG00000033151	0	0	0	0	0	0	0	0	0	0	0	0
ENSGALG00000043063	0	0	1	2	0	1	0	4	3	3	0	2
ENSGALG00000015400	307	319	443	350	490	361	433	418	313	287	379	343
ENSGALG00000033763	0	0	0	0	0	0	0	2	0	0	0	0
ENSGALG00000005845	949	1367	1192	1314	1737	1320	1361	1714	1102	1257	1322	1398
ENSGALG00000020538	113	133	148	138	216	135	186	211	171	188	157	173
ENSGALG00000039312	0	0	0	0	0	0	0	0	0	0	0	0
ENSGALG00000035487	556	676	539	475	738	780	5623	6187	4934	3970	3087	3141
ENSGALG00000035361	0	0	0	0	0	0	0	0	0	0	0	0
ENSGALG00000015164	5	7	5	2	9	6	5	6	8	0	7	5
ENSGALG00000039140	3	10	3	1	9	10	65	98	77	62	46	43
ENSGALG00000032996	150	200	207	169	269	208	338	369	383	268	245	263
ENSGALG00000032673	32	43	63	61	86	43	60	50	52	44	33	27
ENSGALG00000030316	88	135	90	74	145	117	187	188	111	117	154	115
ENSGALG00000006653	0	1	2	5	0	3	0	4	0	1	3	4
ENSGALG00000021473	785	1073	939	905	1191	1027	1447	1386	1417	1189	1401	1292
ENSGALG00000026684	0	0	0	0	0	0	0	0	0	0	0	0
ENSGALG00000038704	668	801	937	887	1158	824	1044	967	921	830	888	725
ENSGALG00000039647	0	0	0	0	0	0	0	0	0	0	0	0
ENSGALG00000007821	1007	1236	1278	1189	1574	1246	1562	1577	1424	1125	1293	1157
ENSGALG00000036220	8	7	10	8	5	8	7	12	2	6	5	9
ENSGALG00000040820	0	0	1	0	1	0	0	0	0	0	0	0
ENSGALG00000037343	0	0	0	0	0	0	0	0	0	0	0	0
ENSGALG00000007097	193	247	271	267	336	237	227	184	173	140	202	167
ENSGALG00000039733	7	2	9	5	2	4	7	16	11	5	6	6
ENSGALG00000033511	46	62	59	51	72	64	101	135	116	81	110	63
ENSGALG00000036632	0	0	0	0	0	0	1	1	2	1	3	2
ENSGALG00000000745	15	18	18	28	33	16	21	18	5	20	17	17
ENSGALG00000028141	205	231	213	211	328	234	417	464	402	324	331	305
ENSGALG00000037954	0	0	0	0	0	0	0	0	0	0	0	0
ENSGALG00000004671	332	380	332	367	485	344	344	308	293	294	352	331
ENSGALG00000026058	15	16	8	26	57	28	31	24	22	12	30	27
ENSGALG00000043711	1661	1894	2196	2019	2629	1910	1898	1783	1519	1418	1529	1421
ENSGALG00000042537	0	0	0	0	0	0	0	0	0	0	0	0
ENSGALG00000038661	0	0	0	0	0	0	0	0	0	0	0	0
ENSGALG00000011297	200	238	300	238	350	233	236	247	287	211	261	238
ENSGALG00000037430	3	6	5	3	9	4	0	1	2	0	1	2
ENSGALG00000026421	1747	2043	2046	1719	2504	2081	2907	3016	3001	2494	2778	2545
ENSGALG00000033213	0	0	0	0	0	0	0	0	0	0	0	0
ENSGALG00000011015	283	362	361	360	476	323	370	343	358	247	344	356
ENSGALG00000010282	2129	2466	2901	2463	3748	2702	4014	4182	3457	2872	2855	2659
ENSGALG00000028916	0	0	0	0	0	1	0	0	0	0	0	0
ENSGALG00000033112	0	0	0	0	0	0	0	0	0	0	0	0
ENSGALG00000003702	2366	2763	2993	2738	3592	2700	3184	3115	3125	2700	3286	2920
ENSGALG00000038990	1	0	0	2	5	1	1	2	0	0	0	0
ENSGALG00000029796	1	2	3	5	4	5	5	0	3	0	2	0
ENSGALG00000032722	2	1	4	4	1	4	1	1	2	3	1	2
ENSGALG00000036536	2	1	0	1	0	0	12	13	11	22	16	6
ENSGALG00000025672	38	76	80	52	76	74	29	39	31	35	41	46
ENSGALG00000041492	2	0	1	2	2	2	0	0	1	1	0	0
ENSGALG00000030550	2058	2464	2547	2288	3225	2431	1942	1830	1760	1541	1823	1573
ENSGALG00000000106	655	759	758	787	987	733	893	885	924	749	905	767
ENSGALG00000015807	208	234	250	230	264	248	386	378	410	301	326	314
ENSGALG00000004019	128	155	184	158	243	156	185	209	187	128	136	126
ENSGALG00000016913	2	9	7	5	10	8	9	11	14	5	9	6
ENSGALG00000006674	0	4	0	4	1	1	1	2	0	1	1	0
ENSGALG00000035085	4	1	3	2	1	0	0	0	0	0	0	0
ENSGALG00000029600	0	0	0	0	0	0	0	0	0	0	0	0
ENSGALG00000000573	268	334	423	393	552	310	267	234	234	183	199	188
ENSGALG00000012021	7	6	3	4	10	5	5	9	5	5	5	5
ENSGALG00000003329	763	1049	942	928	1200	921	1167	1161	1099	922	1055	1039
ENSGALG00000016487	539	618	630	598	828	633	726	807	770	654	823	769
ENSGALG00000039410	3	3	3	3	2	0	0	0	6	0	4	0
ENSGALG00000037522	1381	1742	1651	1350	2095	1570	1799	1813	1431	1371	1520	1522
ENSGALG00000041675	0	0	0	0	0	0	0	0	0	0	0	0
ENSGALG00000041081	114	156	147	120	178	162	152	154	165	117	150	146
ENSGALG00000010397	26	30	24	44	46	37	22	25	33	20	17	26
ENSGALG00000026408	0	0	0	0	0	0	0	0	0	0	0	0
ENSGALG00000036983	84	108	127	135	139	105	111	128	115	85	92	88
ENSGALG00000006469	2	1	1	0	4	2	2	0	2	0	0	0
ENSGALG00000034654	0	0	0	0	0	0	0	0	0	0	0	0
ENSGALG00000030202	6	12	14	12	13	14	9	6	10	2	6	3
ENSGALG00000030517	0	0	0	0	0	0	0	0	0	0	0	0
ENSGALG00000025472	0	0	0	0	0	0	0	0	0	0	0	0
ENSGALG00000037309	13	12	19	31	30	19	8	5	7	7	11	8
ENSGALG00000023032	0	0	0	1	0	0	0	0	0	0	0	0
ENSGALG00000041342	0	5	4	5	5	5	8	4	3	1	4	3
ENSGALG00000006357	516	688	665	684	880	650	720	639	647	598	667	645
ENSGALG00000010325	3869	4383	4494	4827	6109	4295	4309	3935	3809	3358	4162	3634
ENSGALG00000041328	23	28	30	31	45	37	23	29	13	21	15	17
ENSGALG00000005173	1265	1302	1525	1379	1790	1318	856	830	845	774	930	835
ENSGALG00000037079	26	20	18	25	28	24	99	74	67	63	64	60
ENSGALG00000027835	240	359	304	219	364	355	429	519	464	396	443	468
ENSGALG00000001805	1793	1948	1783	1628	1964	1881	3241	3116	2929	2830	3052	3006
ENSGALG00000007698	155	219	243	206	228	177	644	707	608	482	652	573
ENSGALG00000009020	1735	1950	2420	2024	2864	1879	1572	1629	1444	1031	1131	992
ENSGALG00000032798	16	18	17	12	12	33	47	57	45	30	32	34
ENSGALG00000025151	6	4	5	6	5	1	0	2	2	1	4	2
ENSGALG00000014138	380	423	481	414	642	426	382	394	372	297	352	320
ENSGALG00000003126	22	35	26	26	40	37	25	24	22	19	17	23
ENSGALG00000038575	9	5	4	1	7	8	29	24	26	21	30	13
ENSGALG00000041205	8	18	19	9	6	24	357	514	340	291	214	199
ENSGALG00000015589	231	296	276	316	377	306	266	243	228	209	258	242
ENSGALG00000010628	4743	5859	6089	6636	8938	5814	5045	5168	5221	3550	4912	4019
ENSGALG00000029404	6	4	4	6	7	4	3	4	1	2	0	3
ENSGALG00000023953	9	9	21	7	10	13	4	7	7	3	11	3
ENSGALG00000039721	12	29	22	14	23	31	8	9	8	12	5	9
ENSGALG00000035771	0	2	0	1	0	0	0	0	0	0	0	0
ENSGALG00000042062	4	2	6	8	4	9	29	38	23	29	22	13
ENSGALG00000038932	21	26	12	21	21	21	1	3	7	3	7	6
ENSGALG00000039685	172	220	207	171	303	225	969	1133	1024	719	621	661
ENSGALG00000032960	0	0	0	0	0	0	0	0	0	0	0	0
ENSGALG00000031630	3	3	5	5	16	10	2	2	1	2	0	5
ENSGALG00000038378	32	23	11	22	25	43	558	567	534	434	305	361
ENSGALG00000040785	57	61	67	46	48	44	49	43	46	34	53	50
ENSGALG00000008103	109	130	116	95	161	129	194	185	188	133	185	159
ENSGALG00000027564	82	130	100	103	122	83	177	182	175	130	226	153
ENSGALG00000008034	177	262	220	161	283	248	497	526	339	354	369	330
ENSGALG00000031388	1043	1152	1147	1045	1489	1206	1273	1193	1196	1088	1299	1165
ENSGALG00000007456	254	304	301	249	420	299	380	424	351	288	315	293
ENSGALG00000027825	4	4	9	6	10	9	8	2	9	3	9	6
ENSGALG00000003135	1494	1774	1813	1675	2397	1597	1655	1559	1469	1234	1527	1402
ENSGALG00000035498	115	152	93	188	223	130	122	172	138	75	146	114
ENSGALG00000033164	0	0	0	0	0	0	0	0	0	0	0	0
ENSGALG00000037883	0	3	5	3	2	0	0	0	0	1	2	0
ENSGALG00000031527	87	108	107	138	161	106	178	136	147	118	140	140
ENSGALG00000032076	0	0	0	0	0	0	0	0	0	0	0	0
ENSGALG00000004503	83	124	124	112	162	130	176	167	122	139	130	140
ENSGALG00000011360	11	8	3	5	10	7	14	17	14	21	16	10
ENSGALG00000031899	10	11	10	12	15	14	37	37	29	18	14	10
ENSGALG00000039176	18	21	19	15	19	23	213	240	200	150	135	103
ENSGALG00000028326	30	44	37	28	69	36	59	60	58	48	37	51
ENSGALG00000026698	0	0	0	0	1	0	0	0	0	0	0	0
ENSGALG00000030000	11	9	12	12	13	6	11	4	8	2	5	5
ENSGALG00000032574	15	19	14	25	38	22	17	18	10	7	12	6
ENSGALG00000015338	256	357	383	339	490	329	437	389	421	329	366	345
ENSGALG00000033183	1	0	2	5	3	4	0	0	0	0	1	0
ENSGALG00000031909	0	0	0	0	0	0	0	0	0	0	0	0
ENSGALG00000011046	1004	1324	1253	1661	2367	1510	4544	4572	4861	3423	3914	3868
ENSGALG00000031475	133	176	170	140	195	174	270	336	261	248	234	226
ENSGALG00000001817	1185	1406	1387	1398	1881	1354	2090	2000	1795	1557	1916	1658
ENSGALG00000007190	2864	3258	3212	2932	3968	3455	3989	3881	4116	3319	4002	3541
ENSGALG00000012975	242	277	304	249	341	244	215	178	151	167	126	142
ENSGALG00000002029	891	1015	1150	950	1435	1089	1954	2232	1789	1606	1435	1390
ENSGALG00000030955	0	0	0	0	0	0	0	0	0	0	0	0
ENSGALG00000029367	114	148	83	89	156	170	2162	2623	2042	1658	1454	1275
ENSGALG00000040300	1	1	1	1	0	3	0	1	0	0	3	0
ENSGALG00000035393	1	0	0	2	2	1	3	1	0	1	0	0
ENSGALG00000028647	2	6	0	2	0	0	34	15	15	7	19	16
ENSGALG00000035461	559	631	680	650	902	558	649	546	492	416	528	545
ENSGALG00000006167	581	665	731	738	906	675	621	554	566	483	665	587
ENSGALG00000002106	489	618	576	568	736	536	859	821	697	656	841	751
ENSGALG00000030823	0	0	0	0	0	0	0	0	0	0	0	0
ENSGALG00000042844	3	0	0	5	1	4	175	232	182	175	119	127
ENSGALG00000037895	1	1	2	5	5	1	2	3	0	2	1	2
ENSGALG00000042651	472	592	586	589	738	579	669	669	552	496	613	535
ENSGALG00000010016	897	1075	1159	1155	1483	1014	1230	1198	1308	1034	1237	1162
ENSGALG00000011455	0	0	0	0	0	0	0	1	0	0	0	0
ENSGALG00000040122	0	0	0	0	0	0	0	0	0	0	0	0
ENSGALG00000013537	8979	10947	10138	8824	12182	10962	19479	19922	18454	15922	16989	16285
ENSGALG00000009974	95	128	134	96	165	107	154	131	140	108	123	122
ENSGALG00000009604	1	1	0	0	3	1	1	1	1	3	0	0
ENSGALG00000035412	16	13	31	18	36	20	22	11	11	10	21	20
ENSGALG00000038279	0	0	0	0	0	0	0	0	0	0	0	0
ENSGALG00000015513	149	198	163	185	218	190	240	217	234	183	230	214
ENSGALG00000025650	1	11	8	0	7	5	52	63	57	49	31	31
ENSGALG00000034950	32	32	11	24	30	16	15	24	18	12	17	18
ENSGALG00000017932	0	0	0	0	1	0	0	0	0	0	0	0
ENSGALG00000028277	0	0	0	0	0	0	0	0	0	0	0	0
ENSGALG00000013001	43	42	45	70	75	53	57	58	38	37	46	38
ENSGALG00000032276	0	0	0	0	2	0	0	0	0	0	0	0
ENSGALG00000015577	71	103	91	88	109	85	123	123	108	102	112	95
ENSGALG00000030796	0	0	0	1	1	2	0	0	0	0	0	0
ENSGALG00000031097	0	0	0	0	2	0	0	0	0	0	0	0
ENSGALG00000018263	0	0	1	0	1	3	0	0	0	1	1	1
ENSGALG00000033312	0	0	1	0	0	0	1	1	1	1	0	2
ENSGALG00000038973	31	52	30	18	37	34	65	70	60	64	54	56
ENSGALG00000010878	1151	1325	1321	1101	1547	1327	2761	2997	2478	2278	2431	2199
ENSGALG00000037932	0	0	0	0	0	0	0	0	0	0	0	0
ENSGALG00000040396	0	0	0	0	0	0	0	0	0	0	0	0
ENSGALG00000025693	0	0	1	0	0	1	0	0	0	0	0	0
ENSGALG00000040477	0	0	0	0	0	0	0	0	0	0	0	0
ENSGALG00000035094	27	49	28	38	53	26	72	79	89	58	86	58
ENSGALG00000025812	1	1	3	0	0	1	0	1	0	0	0	0
ENSGALG00000014686	640	873	808	658	963	604	443	404	324	350	393	354
ENSGALG00000029582	451	594	579	582	805	548	640	577	622	484	677	618
ENSGALG00000031603	0	0	0	0	1	1	0	0	0	0	0	0
ENSGALG00000030080	0	0	0	0	0	0	0	0	0	0	0	0
ENSGALG00000023359	0	5	3	0	4	1	3	4	2	2	5	2
ENSGALG00000030011	685	773	840	803	951	778	791	740	748	705	771	685
ENSGALG00000037536	1448	1734	1729	1514	1880	1554	1949	2095	2034	1683	1994	1774
ENSGALG00000012505	15	17	19	18	20	16	15	12	21	12	8	25
ENSGALG00000042932	2	7	2	2	8	5	215	218	172	117	98	109
ENSGALG00000015409	4910	5678	5703	4919	6640	5570	7184	6959	6292	5993	7576	6479
ENSGALG00000039287	1	0	0	0	1	1	89	78	64	69	80	51
ENSGALG00000019802	1	3	0	0	0	0	53	53	37	30	29	28
ENSGALG00000006688	98	98	65	49	75	131	924	1138	954	815	692	659
ENSGALG00000008072	28	50	43	54	47	48	36	38	29	31	45	35
ENSGALG00000036617	0	0	0	0	0	0	0	0	0	0	0	0
ENSGALG00000017376	463	565	634	555	793	618	845	897	745	727	663	604
ENSGALG00000010889	158	236	225	204	232	208	195	144	125	119	161	133
ENSGALG00000033498	71	91	78	68	90	72	99	123	80	65	139	100
ENSGALG00000031777	0	0	0	0	0	0	0	0	0	0	0	0
ENSGALG00000026321	0	0	0	0	0	0	0	0	0	0	0	0
ENSGALG00000036553	104	119	101	94	127	92	135	155	92	93	104	82
ENSGALG00000038426	1	1	0	0	0	1	0	0	0	0	0	0
ENSGALG00000036449	1	1	0	0	1	4	0	0	0	0	0	0
ENSGALG00000009714	165	201	231	210	301	202	229	234	258	188	250	281
ENSGALG00000000239	1	1	1	4	2	4	1	3	8	0	5	2
ENSGALG00000008722	72	89	85	99	117	94	37	39	38	15	35	35
ENSGALG00000011715	13529	16599	15323	14181	20366	15820	28673	28215	27608	22599	23525	23800
ENSGALG00000002952	18	18	20	27	44	34	25	22	24	20	37	41
ENSGALG00000038585	755	932	961	857	1107	967	1876	1992	1639	1466	1371	1320
ENSGALG00000025470	1	5	0	1	0	2	0	0	0	0	0	0
ENSGALG00000016047	267	345	353	370	465	328	658	651	561	557	664	630
ENSGALG00000032805	5	22	3	14	16	12	4	6	7	8	9	11
ENSGALG00000014280	24	43	33	32	35	40	5	6	6	14	5	15
ENSGALG00000025243	0	0	0	0	0	0	0	0	0	0	0	1
ENSGALG00000032832	745	1023	952	811	1161	881	1454	1501	1238	1091	1195	1097
ENSGALG00000005415	2472	2721	2949	2479	3330	2759	1930	1864	1420	1505	1776	1581
ENSGALG00000009615	34	35	39	42	55	35	40	28	48	26	27	28
ENSGALG00000009545	437	521	595	464	709	517	495	440	490	383	455	451
ENSGALG00000028849	2155	2422	2436	2453	3392	2503	2129	1999	1712	1703	2012	1740
ENSGALG00000040587	0	0	0	1	0	0	0	0	0	0	0	0
ENSGALG00000014225	1	4	0	3	6	1	11	7	4	5	3	2
ENSGALG00000003604	68	86	89	78	98	67	221	248	201	162	147	170
ENSGALG00000038574	20	36	25	34	28	19	7	6	2	2	2	13
ENSGALG00000006566	143	196	194	169	222	189	335	357	337	284	280	245
ENSGALG00000031624	2	0	1	0	3	0	0	3	2	0	1	0
ENSGALG00000033118	102	145	139	133	188	107	160	162	156	115	159	122
ENSGALG00000015343	144	184	203	204	229	184	182	159	141	141	140	119
ENSGALG00000043484	59	51	54	63	68	62	110	103	122	81	90	90
ENSGALG00000013737	230	230	247	195	259	216	264	238	218	226	265	230
ENSGALG00000037132	0	0	0	0	0	0	0	0	0	0	0	0
ENSGALG00000025868	43	72	51	38	63	64	199	214	169	135	122	110
ENSGALG00000041382	0	0	0	0	3	0	0	0	0	0	0	0
ENSGALG00000031786	13	16	20	29	20	6	14	26	20	11	15	18
ENSGALG00000005598	1113	1332	1502	1295	1839	1310	1435	1488	1323	1198	1260	1196
ENSGALG00000011770	1394	1594	1635	1482	1931	1600	2285	2078	2197	1814	1959	1946
ENSGALG00000007651	2938	4435	3835	3848	5098	3302	52057	50663	48923	39307	44811	42881
ENSGALG00000039068	1060	1234	1171	1257	1683	1229	1162	1122	918	934	947	952
ENSGALG00000035324	5	20	10	13	20	6	23	20	24	14	23	17
ENSGALG00000037854	61	52	36	42	70	85	690	751	632	590	446	436
ENSGALG00000014854	2763	2818	1988	2470	3568	2978	3221	3943	3734	3170	4237	3296
ENSGALG00000040352	0	0	1	0	1	0	0	0	0	0	0	0
ENSGALG00000033162	3550	4416	4210	3385	5144	4619	8562	9567	8663	6841	6677	6151
ENSGALG00000031106	0	0	0	0	0	0	0	0	0	0	0	0
ENSGALG00000010868	1	0	2	1	2	1	8	11	5	1	4	3
ENSGALG00000034314	0	0	0	0	0	0	0	0	0	0	0	0
ENSGALG00000030930	0	0	0	0	0	0	0	0	0	0	0	0
ENSGALG00000031105	90	119	150	117	168	116	113	100	72	73	83	63
ENSGALG00000006036	330	382	336	362	455	368	452	430	390	386	454	412
ENSGALG00000003161	20	25	24	14	21	19	59	47	51	47	31	28
ENSGALG00000035640	0	0	0	0	0	0	0	0	0	0	0	0
ENSGALG00000007251	673	783	642	551	812	803	1328	1386	1292	1064	1029	1033
ENSGALG00000041707	0	2	1	2	2	0	1	1	0	1	0	1
ENSGALG00000005675	895	1187	1025	788	1376	1267	2240	2722	2260	1891	1924	1832
ENSGALG00000008076	664	775	827	755	993	736	1056	1185	903	856	968	975
ENSGALG00000002285	448	466	483	447	640	482	860	963	905	713	728	681
ENSGALG00000039899	0	0	0	0	0	0	0	0	0	0	0	0
ENSGALG00000036570	0	0	0	0	0	0	0	0	0	0	0	1
ENSGALG00000026940	314	371	315	224	383	358	495	543	414	418	377	333
ENSGALG00000041261	0	0	0	0	0	0	0	0	0	0	0	0
ENSGALG00000037219	116	159	151	144	215	110	144	150	143	104	152	135
ENSGALG00000024056	838	835	705	525	924	1050	4166	4912	3501	3366	2994	2909
ENSGALG00000038569	1	0	1	1	6	1	2	0	1	0	1	0
ENSGALG00000033095	2	1	0	6	5	2	2	3	0	1	1	1
ENSGALG00000035577	5	3	0	2	5	2	1	1	0	0	3	0
ENSGALG00000011491	1717	2043	2119	2056	2635	1975	2847	2773	2870	2328	2701	2511
ENSGALG00000015910	1111	1282	1322	1179	1545	1231	1091	1122	887	883	1157	1080
ENSGALG00000041946	0	0	0	0	0	0	0	0	0	0	0	0
ENSGALG00000034434	672	662	414	371	486	722	2629	3153	2718	2390	2244	2108
ENSGALG00000035883	17	23	24	16	36	36	35	25	19	19	18	19
ENSGALG00000039424	444	556	549	526	706	481	598	619	607	502	582	549
ENSGALG00000036895	0	1	0	1	1	0	11	9	6	3	2	5
ENSGALG00000029727	0	0	0	0	0	0	0	0	0	0	0	0
ENSGALG00000035283	0	0	0	0	0	0	0	0	0	0	0	0
ENSGALG00000014614	2025	2249	2481	2282	3091	2191	2359	2252	1972	1770	2099	1923
ENSGALG00000001856	2	10	13	10	11	10	17	11	12	21	16	16
ENSGALG00000031499	2100	2470	2774	2496	3290	2637	1948	1911	2016	1676	2042	1743
ENSGALG00000030728	0	1	0	0	1	1	1	0	0	0	1	0
ENSGALG00000006482	268	374	396	353	504	345	248	235	239	174	152	166
ENSGALG00000019961	233	265	302	251	334	261	254	236	260	200	225	255
ENSGALG00000016579	1571	1879	2222	1925	2808	1897	1997	2040	2190	1604	1983	1813
ENSGALG00000026712	0	0	0	0	0	0	0	0	0	0	0	0
ENSGALG00000028517	4283	5097	5513	4591	6891	4911	5825	5893	5952	4615	5146	4859
ENSGALG00000041119	0	0	0	0	0	0	0	0	0	0	0	0
ENSGALG00000004093	0	2	2	3	12	0	5	2	0	1	2	2
ENSGALG00000000870	40	42	43	30	55	48	66	89	75	61	86	73
ENSGALG00000005953	272	350	381	320	536	317	347	315	366	296	351	298
ENSGALG00000012613	8	14	9	8	16	16	13	16	14	16	13	13
ENSGALG00000033302	250	264	327	189	336	316	255	275	190	202	195	184
ENSGALG00000038886	5	0	1	1	2	2	1	1	1	1	0	0
ENSGALG00000029485	58	80	47	54	109	63	91	110	91	50	85	65
ENSGALG00000042132	711	896	875	721	1053	853	1131	1188	1042	873	947	850
ENSGALG00000035683	0	0	0	1	1	0	0	0	0	0	0	0
ENSGALG00000038011	0	0	0	0	0	0	0	0	0	0	0	0
ENSGALG00000030093	0	0	1	0	2	0	0	0	1	0	0	0
ENSGALG00000037127	2	9	0	7	3	10	0	4	3	4	0	0
ENSGALG00000032538	0	0	0	0	0	0	0	0	0	0	0	0
ENSGALG00000042846	0	0	0	0	0	0	0	0	0	0	0	0
ENSGALG00000031063	3	8	11	7	13	9	7	7	5	4	4	4
ENSGALG00000033663	3133	3643	3944	3519	4749	3503	3742	3943	3706	3185	3655	3258
ENSGALG00000031036	0	1	1	2	3	1	1	1	0	0	0	0
ENSGALG00000037952	0	1	0	0	1	1	0	1	0	1	1	1
ENSGALG00000016692	68	95	53	66	93	87	122	126	102	115	141	148
ENSGALG00000017870	49	58	92	67	97	59	37	43	48	37	40	38
ENSGALG00000040660	0	0	0	0	0	0	0	0	0	0	0	0
ENSGALG00000031925	0	0	0	0	0	0	0	0	0	0	0	0
ENSGALG00000009287	574	692	764	677	899	674	756	794	699	667	767	632
ENSGALG00000013018	112	178	170	202	240	152	202	189	229	170	207	174
ENSGALG00000014435	252	290	272	254	373	323	739	762	750	565	681	598
ENSGALG00000004341	50	67	53	42	71	50	130	161	121	112	137	113
ENSGALG00000021285	80	89	101	106	110	113	178	149	158	125	153	127
ENSGALG00000029741	3	8	11	8	10	5	1	6	3	4	4	3
ENSGALG00000043038	14	14	6	8	11	11	54	70	64	33	35	24
ENSGALG00000025303	0	0	0	0	1	0	0	0	0	0	0	0
ENSGALG00000004244	461	529	604	519	759	461	518	514	461	387	517	425
ENSGALG00000043174	90	98	99	87	136	86	75	66	61	60	79	62
ENSGALG00000037131	104	133	113	71	123	108	213	233	132	192	131	129
ENSGALG00000004937	1806	2222	2384	2243	3043	2076	2926	2673	2824	2103	2604	2388
ENSGALG00000037241	36	27	28	16	28	37	91	104	82	78	82	57
ENSGALG00000030733	61	59	87	61	82	60	58	54	67	46	40	40
ENSGALG00000036731	63	112	74	40	75	89	808	962	650	597	451	461
ENSGALG00000025920	3	3	0	0	4	1	0	1	0	1	2	1
ENSGALG00000008873	364	417	461	480	584	435	633	629	666	574	688	618
ENSGALG00000039580	3	4	2	2	4	1	0	3	0	2	2	3
ENSGALG00000041234	0	0	0	0	0	0	0	0	0	0	0	0
ENSGALG00000037142	0	0	0	0	0	0	1	3	0	1	0	3
ENSGALG00000002412	796	872	739	532	836	886	2387	2606	2183	1841	1727	1511
ENSGALG00000011229	5859	6502	5570	5138	7329	6736	14236	14438	13757	12025	12551	11644
ENSGALG00000033191	0	0	0	0	0	0	0	0	0	0	0	0
ENSGALG00000031381	358	438	396	378	540	468	595	649	622	438	565	481
ENSGALG00000028304	256	333	234	291	428	283	136	210	124	79	194	123
ENSGALG00000008475	829	978	1115	925	1326	942	3271	3486	3152	2300	2016	2171
ENSGALG00000009111	264	291	286	288	357	283	521	564	466	376	483	427
ENSGALG00000002414	335	398	471	441	594	453	567	572	591	460	494	455
ENSGALG00000029310	4	6	2	6	5	4	0	1	0	0	1	0
ENSGALG00000039285	0	0	0	0	0	0	0	0	0	0	0	0
ENSGALG00000035259	0	0	0	0	0	0	0	0	0	1	0	0
ENSGALG00000004940	163	236	201	190	274	170	242	269	301	237	287	231
ENSGALG00000038472	0	0	0	0	0	0	0	0	0	0	0	0
ENSGALG00000021442	57	60	64	57	88	84	274	297	276	222	188	200
ENSGALG00000004180	412	524	510	434	574	507	2394	2613	2267	1756	1616	1588
ENSGALG00000034141	0	0	0	0	0	0	0	0	0	2	0	0
ENSGALG00000037801	3	10	1	2	6	7	1	0	5	2	0	1
ENSGALG00000028250	14	15	15	14	24	10	13	13	14	13	17	25
ENSGALG00000000223	554	782	775	713	997	759	979	1008	1063	823	810	749
ENSGALG00000015689	2289	2516	2669	2275	3381	2531	2244	1984	1731	1833	2053	1967
ENSGALG00000042309	261	273	164	179	220	313	1697	1734	1573	1275	1183	1175
ENSGALG00000007021	1187	1566	1371	1477	2119	1507	1030	811	716	829	1017	854
ENSGALG00000026600	284	348	337	273	325	312	711	744	563	578	621	524
ENSGALG00000015847	13006	15033	14040	11689	16381	15255	11513	11615	9757	9588	11387	9753
ENSGALG00000043650	4	0	2	2	0	3	0	0	3	3	1	0
ENSGALG00000039790	0	1	0	0	1	0	3	0	0	2	0	2
ENSGALG00000038399	9	8	7	6	7	10	62	63	48	31	25	29
ENSGALG00000012196	264	320	311	320	383	302	581	594	558	484	599	512
ENSGALG00000039118	774	917	882	768	1089	812	1283	1268	1159	1045	1164	1071
ENSGALG00000025474	2	2	2	2	2	0	1	0	0	1	1	1
ENSGALG00000013754	92	123	118	110	144	117	275	247	226	189	239	218
ENSGALG00000030856	0	1	1	3	0	4	1	2	3	1	1	0
ENSGALG00000032626	120	169	137	140	193	174	4595	4941	4779	3143	4625	4185
ENSGALG00000029401	88	90	79	68	126	73	283	315	271	234	205	218
ENSGALG00000030805	0	0	0	2	1	1	1	0	0	1	2	2
ENSGALG00000026945	0	0	0	0	0	0	0	0	0	0	0	0
ENSGALG00000014060	520	625	660	567	765	645	790	771	818	608	764	680
ENSGALG00000029327	397	393	493	410	574	379	413	380	383	342	375	331
ENSGALG00000010312	4	16	9	16	15	5	13	14	12	9	10	10
ENSGALG00000011007	571	621	661	646	793	584	376	442	299	320	410	359
ENSGALG00000006507	1667	2390	2046	1756	2395	2240	3753	4292	3361	3411	3672	3454
ENSGALG00000034178	0	0	1	0	1	0	0	0	0	0	0	0
ENSGALG00000027209	0	0	1	0	1	0	2	0	1	0	1	0
ENSGALG00000039197	17	12	8	4	9	12	337	429	322	249	244	283
ENSGALG00000022955	41	42	63	34	63	38	41	36	27	31	39	26
ENSGALG00000034325	7	23	4	5	12	8	11	6	3	5	4	6
ENSGALG00000033975	0	0	0	0	0	0	0	0	0	0	0	0
ENSGALG00000030055	737	854	679	565	861	963	3373	4061	3005	2508	2148	1978
ENSGALG00000000436	0	0	0	0	0	0	0	0	0	0	0	0
ENSGALG00000029552	0	9	3	13	7	3	3	3	3	5	4	2
ENSGALG00000038504	706	770	761	612	872	779	1192	1192	872	841	993	900
ENSGALG00000043215	0	0	0	0	0	0	0	0	0	0	0	0
ENSGALG00000033944	1	0	0	1	1	0	0	2	0	0	0	0
ENSGALG00000042124	0	0	0	0	0	0	0	0	0	0	0	0
ENSGALG00000042743	0	0	0	0	0	0	0	0	0	0	0	0
ENSGALG00000042858	785	886	952	887	1236	800	1108	994	1130	843	980	901
ENSGALG00000026063	1	1	1	0	0	0	1	0	0	1	1	0
ENSGALG00000036067	210	272	225	259	321	233	303	280	259	240	308	298
ENSGALG00000033223	2	0	4	3	0	5	8	14	12	10	12	9
ENSGALG00000008208	2495	2983	2944	2865	3613	3018	3561	3411	3346	2948	3539	3086
ENSGALG00000038310	0	0	0	0	0	0	0	0	0	0	0	0
ENSGALG00000008814	2	17	12	9	23	6	13	5	11	8	9	24
ENSGALG00000011619	166	199	191	141	213	216	637	658	592	475	541	423
ENSGALG00000042085	7	5	12	7	22	6	11	18	5	3	3	7
ENSGALG00000010619	879	1070	1074	1109	1403	1033	1351	1385	1283	1070	1355	1123
ENSGALG00000030429	14	14	10	10	18	7	8	5	9	3	9	3
ENSGALG00000031212	14	22	7	9	18	26	546	695	491	454	317	304
ENSGALG00000014692	569	699	628	611	824	689	1037	993	952	899	1099	946
ENSGALG00000034426	201	234	257	211	363	286	305	338	271	271	299	248
ENSGALG00000033806	164	197	136	90	164	189	924	1150	731	682	473	377
ENSGALG00000026098	86565	95891	127477	124068	175075	111959	92930	92076	112710	62505	82433	65258
ENSGALG00000006568	1470	1730	1830	1573	2180	1642	2066	2219	2063	1706	1874	1708
ENSGALG00000004191	490	651	519	453	749	621	1564	1718	1476	1102	1279	1325
ENSGALG00000031775	0	0	0	0	0	0	3	3	2	1	3	1
ENSGALG00000033139	0	0	0	0	0	0	0	0	0	0	0	0
ENSGALG00000025286	0	0	0	0	0	0	0	0	0	0	0	0
ENSGALG00000043184	2	0	0	0	0	0	0	0	1	0	0	0
ENSGALG00000001720	333	395	458	375	500	416	426	426	383	321	455	366
ENSGALG00000008108	2385	2813	2822	2571	3515	2988	3285	3272	3393	2705	3070	2887
ENSGALG00000039981	0	0	0	0	0	0	0	0	0	0	0	0
ENSGALG00000034368	1	0	0	1	0	0	0	1	1	0	0	0
ENSGALG00000017068	1	1	1	8	0	2	2	0	2	0	3	3
ENSGALG00000015051	228	278	237	229	324	303	308	284	240	250	260	239
ENSGALG00000041442	0	1	3	6	2	7	5	3	3	3	1	1
ENSGALG00000033317	0	0	0	0	0	0	0	0	0	0	0	0
ENSGALG00000031541	0	0	0	0	0	0	0	0	0	0	0	0
ENSGALG00000004585	49	47	44	52	80	64	61	83	59	71	71	77
ENSGALG00000017857	16	26	13	21	33	23	20	25	11	14	22	25
ENSGALG00000014956	257	362	320	369	444	333	476	465	456	348	459	413
ENSGALG00000020049	1	0	0	1	0	1	1	0	0	0	0	0
ENSGALG00000032190	176	274	198	186	239	229	525	561	384	407	456	411
ENSGALG00000041621	3385	5434	4756	4396	6601	4983	50483	55876	54442	37553	42071	38708
ENSGALG00000010110	331	425	463	362	633	429	815	965	846	629	727	606
ENSGALG00000025729	0	0	0	0	0	0	1	2	1	0	0	1
ENSGALG00000020201	114	139	145	161	196	135	175	190	193	164	263	197
ENSGALG00000002726	4163	4822	4833	4407	6445	4540	4507	4201	3403	3372	3795	3551
ENSGALG00000013369	2226	2800	2916	2496	3616	2857	4029	4141	3766	3153	3510	3203
ENSGALG00000037472	3	3	9	10	4	7	3	13	3	2	5	6
ENSGALG00000029196	13	12	13	16	28	11	11	8	14	9	8	3
ENSGALG00000035003	0	0	1	0	0	0	0	0	0	0	0	0
ENSGALG00000006424	268	250	257	230	354	269	542	612	468	439	393	367
ENSGALG00000007082	188	227	228	224	287	227	357	327	344	273	308	300
ENSGALG00000036467	0	0	0	0	0	0	0	0	0	0	0	0
ENSGALG00000039762	0	0	0	0	0	0	0	0	0	0	0	0
ENSGALG00000035301	10	10	9	17	15	16	15	9	13	9	7	12
ENSGALG00000039045	0	0	0	0	0	0	0	1	0	0	0	0
ENSGALG00000030111	26	48	47	63	79	38	56	52	43	35	26	28
ENSGALG00000038901	40	52	63	39	71	48	182	210	112	121	124	94
ENSGALG00000001862	30	62	43	44	64	47	48	29	27	26	32	23
ENSGALG00000040144	0	0	0	0	0	0	0	0	0	0	0	0
ENSGALG00000041525	26	36	25	27	38	28	62	67	36	53	39	38
ENSGALG00000006479	0	0	0	0	0	0	0	1	0	1	0	0
ENSGALG00000016915	7479	8646	8981	8186	10910	8267	6664	6127	4981	5433	6192	5589
ENSGALG00000001262	5986	6641	7227	6236	7790	6423	9331	9280	8483	7874	8764	8155
ENSGALG00000028710	3	6	3	2	6	6	5	8	5	7	7	11
ENSGALG00000041731	222	284	257	253	370	263	269	305	263	261	293	232
ENSGALG00000040341	0	0	0	0	0	0	0	0	0	0	0	0
ENSGALG00000027040	0	4	4	9	15	3	3	5	7	7	6	2
ENSGALG00000016523	0	1	1	3	3	1	3	5	0	0	0	1
ENSGALG00000040475	262	289	344	278	417	296	305	365	282	250	271	246
ENSGALG00000039750	0	0	0	1	0	0	0	0	0	0	0	0
ENSGALG00000004442	1058	1428	1133	1013	1406	1339	1509	1505	1476	1440	1629	1503
ENSGALG00000035733	10	9	10	7	12	10	2	5	6	1	3	8
ENSGALG00000038986	2	0	0	0	0	0	0	1	0	0	0	0
ENSGALG00000027173	479	552	570	520	744	508	706	674	781	607	719	674
ENSGALG00000038707	0	1	4	0	1	0	0	0	0	0	0	0
ENSGALG00000033606	128	173	140	159	208	190	175	151	111	116	146	134
ENSGALG00000028380	0	0	0	0	0	0	0	0	0	0	0	0
ENSGALG00000040497	0	0	0	0	1	0	0	0	0	0	0	0
ENSGALG00000041085	0	0	1	1	0	1	9	18	9	8	4	6
ENSGALG00000036597	1	1	2	2	2	0	0	0	0	0	0	0
ENSGALG00000037327	174	265	264	260	356	218	245	220	222	187	254	228
ENSGALG00000012994	1619	1823	1709	1640	2190	1767	1173	1134	943	1091	1080	1042
ENSGALG00000035150	74	58	91	86	92	64	82	90	90	86	84	76
ENSGALG00000001084	29	28	55	29	51	35	42	42	47	20	24	30
ENSGALG00000020479	498	596	565	466	729	645	1213	1388	1214	924	785	798
ENSGALG00000035417	1381	1635	1762	1607	2137	1519	1668	1608	1754	1381	1826	1768
ENSGALG00000042067	660	790	820	610	979	791	1142	1127	1105	871	966	836
ENSGALG00000035696	116	116	111	124	166	116	98	87	86	65	86	78
ENSGALG00000039146	7	6	7	12	8	9	5	3	1	3	4	4
ENSGALG00000031655	70	63	63	63	104	55	60	55	34	43	47	49
ENSGALG00000038903	0	0	0	0	1	0	0	0	0	0	0	0
ENSGALG00000033396	0	0	0	0	0	0	0	0	0	0	0	0
ENSGALG00000009405	460	528	570	446	669	514	506	507	435	393	443	426
ENSGALG00000039727	5	9	2	5	14	4	9	5	7	5	8	6
ENSGALG00000010969	0	0	0	2	0	0	0	0	0	1	0	0
ENSGALG00000030069	60	86	83	104	134	72	77	58	75	52	69	65
ENSGALG00000036291	0	0	0	0	0	0	0	0	0	0	0	0
ENSGALG00000042613	1	3	6	2	7	1	2	3	4	1	1	1
ENSGALG00000035471	2	0	2	0	0	0	0	1	0	1	1	0
ENSGALG00000017817	7	11	6	10	2	2	3	4	1	4	0	2
ENSGALG00000006202	65	107	115	77	117	96	239	284	223	183	212	186
ENSGALG00000038594	0	0	0	0	0	0	0	1	0	0	2	0
ENSGALG00000011325	797	924	826	810	1137	914	1006	1008	1082	864	1004	941
ENSGALG00000041465	2	3	7	4	2	6	4	6	2	3	0	2
ENSGALG00000014963	1681	1813	1907	1590	2256	1864	3243	3341	2683	2645	3013	2484
ENSGALG00000038841	0	0	0	0	0	0	0	0	0	0	0	0
ENSGALG00000009095	43	69	79	65	108	71	59	76	84	57	56	51
ENSGALG00000012684	912	1166	974	1129	1477	1111	1619	1531	1494	1321	1679	1457
ENSGALG00000002374	192	221	211	189	230	191	184	167	192	200	256	208
ENSGALG00000031731	0	0	0	0	0	0	0	0	0	0	0	0
ENSGALG00000025546	0	0	0	0	0	0	1	3	0	6	1	0
ENSGALG00000016492	3	8	2	7	3	3	4	2	0	1	2	4
ENSGALG00000000521	4	10	4	4	9	12	121	129	86	72	57	77
ENSGALG00000034448	0	4	2	1	3	6	2	2	2	3	2	2
ENSGALG00000037693	14	16	12	14	26	18	11	6	12	8	12	9
ENSGALG00000037926	0	0	0	0	0	0	0	0	0	0	0	0
ENSGALG00000006817	615	695	697	686	878	745	1048	1105	1107	878	1019	924
ENSGALG00000036845	0	0	0	0	0	0	0	0	0	0	0	0
ENSGALG00000010869	506	635	609	547	915	595	537	580	448	409	511	428
ENSGALG00000011744	1042	1314	1242	997	1462	1243	1807	1760	1459	1414	1470	1427
ENSGALG00000040515	0	0	0	0	0	0	0	0	0	0	0	0
ENSGALG00000030403	201	236	270	229	318	211	205	163	157	138	139	152
ENSGALG00000013956	191	216	272	259	381	215	287	240	277	222	230	194
ENSGALG00000012396	11	31	18	17	26	25	146	159	123	103	70	85
ENSGALG00000027002	0	0	0	0	0	0	0	0	0	0	0	0
ENSGALG00000014965	2	1	3	2	6	11	6	2	3	0	0	3
ENSGALG00000017314	135	180	197	188	235	155	220	229	132	186	170	177
ENSGALG00000013156	372	456	382	441	657	411	626	601	648	531	612	520
ENSGALG00000033988	0	0	0	0	0	0	0	0	0	0	0	0
ENSGALG00000022815	0	0	0	0	2	0	0	0	0	1	1	2
ENSGALG00000012144	333	392	468	329	467	382	426	503	398	367	360	327
ENSGALG00000005571	739	926	912	893	1092	847	1130	1139	1149	950	1130	1051
ENSGALG00000010005	280	344	388	313	462	298	285	318	299	239	217	257
ENSGALG00000036129	0	0	0	0	0	0	0	0	0	0	0	0
ENSGALG00000035937	1	3	4	4	6	2	1	0	5	0	1	0
ENSGALG00000015219	14	35	40	19	36	22	43	46	33	35	30	37
ENSGALG00000026907	0	0	0	0	0	0	1	0	0	0	0	0
ENSGALG00000017792	2	0	1	0	0	0	0	0	0	0	0	2
ENSGALG00000017199	849	925	988	922	1333	935	1341	1352	1045	1095	1048	988
ENSGALG00000038573	350	406	500	511	666	442	324	315	306	239	208	205
ENSGALG00000042225	2	12	2	5	7	7	0	2	0	2	0	2
ENSGALG00000003403	1	1	2	3	0	0	0	0	0	0	1	2
ENSGALG00000002466	66	76	67	60	85	64	64	65	43	46	61	53
ENSGALG00000008237	149	189	195	176	249	164	192	182	179	130	221	190
ENSGALG00000017611	438	560	325	288	437	585	1949	1944	1846	1455	1516	1332
ENSGALG00000027305	0	4	1	1	2	0	3	3	0	3	3	1
ENSGALG00000042400	2259	2577	2698	2407	3317	2589	2692	2618	2543	2369	2751	2461
ENSGALG00000010115	387	385	449	445	640	404	373	355	386	306	397	315
ENSGALG00000042809	277	266	150	140	228	325	2866	3109	2631	2244	1894	1939
ENSGALG00000037428	0	0	0	0	0	0	0	0	0	0	0	0
ENSGALG00000000504	18	29	16	15	27	26	568	586	470	355	387	378
ENSGALG00000007218	124	137	180	131	188	117	147	128	164	124	127	106
ENSGALG00000029786	0	0	0	0	0	0	0	0	0	0	0	0
ENSGALG00000033722	0	0	0	0	0	0	0	0	0	0	0	0
ENSGALG00000015443	194	222	226	182	255	189	236	279	269	180	252	211
ENSGALG00000013035	1	0	0	0	13	1	1	1	0	0	0	1
ENSGALG00000036925	47	49	33	29	49	40	162	150	100	115	112	92
ENSGALG00000005456	57	74	66	67	95	79	120	109	120	100	127	87
ENSGALG00000042964	0	0	0	0	0	0	0	0	0	0	0	0
ENSGALG00000009003	1	1	3	0	5	1	2	3	2	4	1	2
ENSGALG00000023066	774	960	930	925	1109	930	1907	1885	1924	1546	1883	1638
ENSGALG00000019844	0	0	0	0	0	0	0	0	1	0	0	0
ENSGALG00000002719	2724	3307	3512	3400	4544	3289	4137	4230	3918	3222	3851	3362
ENSGALG00000032616	2	10	8	4	5	6	2	3	0	5	4	2
ENSGALG00000011220	163	191	173	146	194	191	356	391	298	294	330	317
ENSGALG00000031214	385	509	425	452	617	467	886	960	852	715	819	760
ENSGALG00000039997	3	2	1	0	9	1	0	0	0	2	0	0
ENSGALG00000033625	0	0	0	0	0	0	0	0	0	0	0	0
ENSGALG00000016880	577	620	717	585	815	622	697	714	727	586	691	575
ENSGALG00000043318	185	174	194	208	234	179	241	239	235	209	226	203
ENSGALG00000002127	23	26	12	21	40	30	55	69	76	50	61	57
ENSGALG00000043336	834	1033	891	675	1050	999	1778	1842	1769	1390	1549	1428
ENSGALG00000032463	0	1	1	0	2	1	0	0	0	0	0	0
ENSGALG00000036723	0	0	0	0	1	0	0	0	1	0	6	1
ENSGALG00000005328	589	638	670	585	929	667	943	971	995	739	898	770
ENSGALG00000033037	24	24	20	17	30	22	32	43	22	25	24	18
ENSGALG00000040410	0	0	0	0	0	0	0	0	0	0	0	0
ENSGALG00000039001	4398	5296	5082	4994	6832	4835	4919	4620	4339	3553	4495	4050
ENSGALG00000026187	1	0	0	0	0	2	0	0	0	1	1	1
ENSGALG00000042138	4	4	8	4	7	7	0	2	3	7	4	4
ENSGALG00000034714	0	0	0	1	1	0	0	0	0	0	0	1
ENSGALG00000011238	4404	5441	5221	3958	5884	5075	8530	9145	7903	7531	7943	7402
ENSGALG00000007723	203	234	247	245	343	236	507	579	519	382	453	389
ENSGALG00000017898	0	0	0	0	0	0	0	0	1	0	0	0
ENSGALG00000012137	3378	4000	3374	3623	4706	3675	3928	3625	3276	3166	4021	3511
ENSGALG00000021020	18	22	21	19	32	28	25	26	16	23	25	14
ENSGALG00000043001	1	1	1	8	6	4	0	0	0	0	0	0
ENSGALG00000031908	0	0	1	2	3	1	2	1	0	0	1	1
ENSGALG00000031067	132	123	89	57	101	126	1944	2478	1456	1556	1247	1094
ENSGALG00000009205	38	48	50	33	53	57	148	129	113	104	95	90
ENSGALG00000031997	53	75	61	66	99	92	92	106	86	96	95	87
ENSGALG00000032301	0	0	0	0	0	0	0	0	0	0	0	0
ENSGALG00000043659	0	0	0	0	0	0	0	0	0	0	0	0
ENSGALG00000003068	435	548	587	542	727	553	687	761	589	552	538	596
ENSGALG00000016582	158	231	236	202	266	259	331	362	320	318	450	315
ENSGALG00000000469	0	4	1	4	5	1	4	5	0	2	2	4
ENSGALG00000043570	728	915	877	872	1062	911	1128	1185	1115	922	1269	1046
ENSGALG00000033209	0	0	0	0	0	0	0	0	0	0	0	0
ENSGALG00000010228	568	624	629	580	721	567	802	788	722	604	615	601
ENSGALG00000001420	1335	1490	1823	1564	2230	1610	1840	1975	1501	1479	1623	1456
ENSGALG00000036609	0	0	0	0	0	0	0	0	0	0	0	0
ENSGALG00000037466	0	0	0	0	0	0	0	0	0	0	0	0
ENSGALG00000029599	674	821	736	478	828	759	1824	1960	1502	1346	1292	1186
ENSGALG00000035859	0	0	0	0	0	0	0	0	0	0	0	0
ENSGALG00000005918	6	7	19	7	22	11	23	19	20	16	27	12
ENSGALG00000041440	0	0	1	2	1	0	0	0	0	0	0	0
ENSGALG00000043207	0	0	0	0	0	0	0	0	0	0	0	0
ENSGALG00000038715	6	12	3	7	13	12	251	257	180	204	201	165
ENSGALG00000004963	392	402	386	333	486	487	1349	1375	1288	1150	976	966
ENSGALG00000010301	993	1249	1236	1102	1645	1248	1800	1990	1977	1579	1707	1661
ENSGALG00000031109	0	0	0	0	0	0	0	0	0	0	1	0
ENSGALG00000038775	4655	5502	4931	4492	6074	5158	6984	6532	5445	6010	6887	6210
ENSGALG00000036009	0	0	0	0	0	0	0	0	0	0	0	0
ENSGALG00000041700	1813	2159	1994	1702	2399	2271	4295	4438	4256	3653	3801	3574
ENSGALG00000031613	0	0	0	0	0	0	0	0	0	0	0	0
ENSGALG00000037221	0	0	0	0	0	0	0	0	0	0	0	0
ENSGALG00000029493	0	0	0	0	0	0	0	0	0	0	0	0
ENSGALG00000011324	644	903	856	619	1080	906	2692	3147	2661	2225	2015	1939
ENSGALG00000005327	0	0	0	0	0	0	0	0	0	0	1	0
ENSGALG00000042367	0	0	0	0	0	0	0	0	0	0	0	0
ENSGALG00000025655	0	0	0	0	4	1	0	0	0	1	0	0
ENSGALG00000036665	0	0	0	0	0	0	0	0	0	0	0	0
ENSGALG00000008574	762	826	846	836	1180	926	1171	1165	1066	898	982	947
ENSGALG00000014448	431	540	523	556	645	497	708	657	702	547	687	583
ENSGALG00000038965	0	0	0	0	0	0	0	0	0	0	0	0
ENSGALG00000033834	135	188	138	191	191	187	224	225	215	218	301	250
ENSGALG00000041093	96	111	100	115	138	98	190	174	159	119	141	142
ENSGALG00000009268	2	0	1	3	1	2	0	0	0	0	2	1
ENSGALG00000014509	276	290	380	376	525	321	201	195	188	164	213	179
ENSGALG00000010209	425	484	500	445	626	499	1104	1267	1049	935	1015	927
ENSGALG00000029592	1	1	1	0	1	0	2	0	1	0	0	1
ENSGALG00000006061	1282	1473	1460	1374	1957	1492	2822	2763	2412	2299	2491	2235
ENSGALG00000007636	1	0	1	0	2	1	1	2	0	2	3	0
ENSGALG00000007952	1705	2112	2047	1844	2578	2065	3012	3233	2775	2349	2476	2223
ENSGALG00000041472	0	0	0	0	0	0	0	0	0	0	0	0
ENSGALG00000028345	0	0	0	0	1	0	0	1	0	0	0	0
ENSGALG00000041453	1043	1129	895	660	1126	1202	3465	3811	3412	2865	2767	2527
ENSGALG00000035840	0	0	2	0	0	0	0	0	0	0	0	1
ENSGALG00000006077	1279	1526	1450	1410	1855	1539	2263	2252	2267	1893	2289	2171
ENSGALG00000008408	51	54	56	48	77	73	62	74	50	71	71	58
ENSGALG00000037383	0	0	0	0	0	0	0	0	0	0	0	0
ENSGALG00000028598	1	0	3	3	0	3	1	0	0	0	0	1
ENSGALG00000019003	128	144	146	128	199	132	226	211	184	124	130	158
ENSGALG00000033436	0	0	0	0	0	0	0	0	0	0	0	0
ENSGALG00000004629	2008	2419	2170	1667	2552	2267	6425	7055	5952	5209	4858	4635
ENSGALG00000038963	0	0	0	0	0	0	0	0	0	0	0	0
ENSGALG00000037411	0	0	1	0	0	1	0	3	0	1	2	0
ENSGALG00000007666	4	7	5	7	6	12	4	7	7	1	2	2
ENSGALG00000025443	0	0	0	0	0	0	0	0	0	0	0	0
ENSGALG00000029229	0	0	0	0	0	0	0	0	0	0	0	0
ENSGALG00000042772	2	1	3	6	5	0	1	0	0	0	0	0
ENSGALG00000024497	7	12	13	11	16	7	11	4	9	3	9	4
ENSGALG00000035996	2314	3111	2737	2258	3545	3098	4033	4080	3806	3197	4145	3630
ENSGALG00000007331	6167	7660	7295	7653	10781	7729	5393	5352	4515	4509	5442	4695
ENSGALG00000001728	475	579	545	446	726	547	978	996	828	685	542	576
ENSGALG00000040371	5458	6435	6640	6179	7758	6113	6618	6827	7163	5456	7590	6446
ENSGALG00000019397	715	812	955	811	1069	759	804	839	908	714	858	760
ENSGALG00000029817	1295	1572	1578	1522	2211	1639	2311	2271	2309	1781	2130	1895
ENSGALG00000004144	2994	3178	3639	3474	4637	3620	3979	3792	4074	3170	3420	3223
ENSGALG00000015050	467	551	546	514	741	534	976	925	800	734	789	759
ENSGALG00000031924	0	2	3	2	5	2	1	4	0	1	0	0
ENSGALG00000015333	288	353	394	347	418	312	251	239	202	199	233	198
ENSGALG00000003029	158	204	175	145	236	206	495	613	506	403	347	319
ENSGALG00000012056	2	0	1	3	3	2	1	0	3	0	1	1
ENSGALG00000037998	59	105	83	52	93	101	298	311	253	269	253	260
ENSGALG00000041117	1	0	0	0	2	5	0	1	2	0	0	0
ENSGALG00000039261	488	649	544	399	622	592	849	972	754	721	669	598
ENSGALG00000037488	0	0	0	0	0	0	0	0	0	0	0	0
ENSGALG00000000950	677	836	905	733	969	695	826	840	714	641	652	639
ENSGALG00000042298	6	3	3	3	10	2	8	2	6	0	0	3
ENSGALG00000040969	236	252	266	246	327	281	303	334	309	238	240	236
ENSGALG00000007287	317	400	355	358	481	437	662	708	592	540	518	493
ENSGALG00000040452	0	0	0	0	0	0	0	0	0	0	0	0
ENSGALG00000037313	0	1	2	0	0	1	0	0	0	0	0	0
ENSGALG00000003348	5	18	18	14	18	20	355	298	250	247	261	215
ENSGALG00000041218	8	9	6	9	6	15	1	1	0	0	0	2
ENSGALG00000029474	18	45	34	26	59	21	38	42	36	22	47	36
ENSGALG00000014868	9890	11567	13529	12507	16412	11635	11028	10793	12258	8844	10607	9457
ENSGALG00000036584	0	0	0	0	0	0	0	0	0	0	0	0
ENSGALG00000031180	13	19	13	7	17	6	22	15	14	13	9	5
ENSGALG00000003212	18	20	20	19	34	28	10	14	14	7	9	8
ENSGALG00000029827	0	1	1	2	1	1	0	0	0	0	0	0
ENSGALG00000035779	15	9	6	16	10	7	6	15	8	11	9	6
ENSGALG00000011733	19	38	25	36	61	33	19	36	18	10	34	18
ENSGALG00000033710	0	0	0	0	0	0	0	0	0	0	0	0
ENSGALG00000041148	1	0	0	1	1	1	0	0	0	1	0	0
ENSGALG00000038879	119	136	69	55	108	160	524	586	447	422	378	345
ENSGALG00000015900	0	0	0	0	0	0	0	0	0	0	0	0
ENSGALG00000015119	1489	1829	1653	1681	2188	1845	2367	2346	2303	1956	2399	2104
ENSGALG00000030844	229	296	295	331	419	286	304	284	288	204	259	253
ENSGALG00000002973	708	781	795	786	1134	812	1108	1187	1011	863	1136	1006
ENSGALG00000034797	0	0	0	0	0	0	0	0	0	0	0	1
ENSGALG00000033811	101	89	111	66	113	123	1134	1174	1014	847	679	669
ENSGALG00000041804	21	13	33	35	31	17	17	20	17	13	18	17
ENSGALG00000034199	1	0	0	0	0	0	0	0	0	0	0	0
ENSGALG00000037716	3810	4945	4099	3402	5829	5158	7207	7589	7031	5746	5449	5147
ENSGALG00000005417	687	848	912	752	1009	815	799	808	811	704	887	755
ENSGALG00000040733	5	6	10	6	8	11	6	9	4	4	3	6
ENSGALG00000027802	1	3	2	1	1	0	1	5	5	8	6	3
ENSGALG00000011881	876	1004	1008	916	1124	1050	1064	1015	985	979	1021	960
ENSGALG00000010227	593	753	603	760	1003	720	839	799	938	661	829	779
ENSGALG00000041674	0	0	0	0	0	0	0	0	0	0	0	0
ENSGALG00000015843	90	79	97	81	105	95	134	82	106	80	110	83
ENSGALG00000033435	7	3	9	9	4	8	12	4	7	3	5	4
ENSGALG00000002282	549	710	697	703	812	617	688	712	677	554	669	591
ENSGALG00000008352	4	2	4	5	5	9	3	11	5	9	6	8
ENSGALG00000017008	401	544	547	428	640	519	413	459	430	373	439	351
ENSGALG00000002301	6072	7561	7823	7143	10438	7386	7355	6970	5795	5828	6171	5936
ENSGALG00000030043	0	0	0	0	0	0	0	0	0	0	0	0
ENSGALG00000011630	2239	2528	2790	2126	3221	2378	2709	2760	2147	2123	1982	1875
ENSGALG00000035483	0	0	0	0	0	0	0	0	0	0	4	1
ENSGALG00000025238	2	1	1	1	1	0	1	0	0	0	0	0
ENSGALG00000037331	0	0	0	0	0	0	0	0	0	0	0	0
ENSGALG00000041769	375	439	423	401	544	485	1064	1222	1105	927	644	679
ENSGALG00000039442	288	306	373	335	428	293	384	370	329	290	351	297
ENSGALG00000043333	11	12	9	4	15	14	32	31	24	26	23	19
ENSGALG00000034699	0	0	0	0	0	0	0	0	0	0	0	0
ENSGALG00000038298	26	21	18	15	24	21	36	42	32	34	35	36
ENSGALG00000043091	7	6	9	13	16	16	7	5	5	9	6	7
ENSGALG00000028983	292	361	325	348	456	316	590	561	577	400	470	409
ENSGALG00000010713	177	220	181	197	285	186	271	251	243	241	257	204
ENSGALG00000005383	252	318	331	278	429	350	556	542	581	389	443	426
ENSGALG00000003429	1340	1606	1368	1174	1615	1451	3123	3313	2559	2767	2795	2499
ENSGALG00000002024	126	192	125	133	209	134	124	126	104	76	150	115
ENSGALG00000015218	18	24	15	22	40	23	28	33	29	31	19	33
ENSGALG00000035545	0	0	2	3	0	0	0	1	0	0	0	2
ENSGALG00000041118	10	15	26	17	28	14	15	5	18	8	9	1
ENSGALG00000036077	0	0	0	0	0	0	0	0	0	0	0	0
ENSGALG00000009016	344	409	469	541	665	384	310	287	332	207	259	222
ENSGALG00000036837	2125	2417	2517	2388	3058	2407	3054	3021	3311	2633	3065	2918
ENSGALG00000042009	226	290	268	332	417	366	262	219	198	206	262	207
ENSGALG00000030528	0	0	0	0	0	0	0	0	0	0	1	0
ENSGALG00000033999	0	1	0	3	2	2	1	0	0	0	0	0
ENSGALG00000042856	0	0	0	0	0	0	0	0	0	0	0	0
ENSGALG00000023925	3	3	1	3	2	1	0	0	1	0	1	1
ENSGALG00000006513	0	0	0	0	0	1	0	0	0	0	0	0
ENSGALG00000029233	1	4	3	2	3	3	1	1	1	0	4	0
ENSGALG00000032181	372	479	455	427	558	356	309	274	220	269	283	277
ENSGALG00000017363	107	119	126	112	185	133	173	184	178	176	224	163
ENSGALG00000037738	109	96	84	96	152	184	403	511	387	323	319	313
ENSGALG00000036073	8622	10365	8054	6422	9976	9882	12178	13446	11472	10720	10115	9521
ENSGALG00000032622	7	10	9	4	15	13	9	10	2	5	6	4
ENSGALG00000025293	2	0	0	2	1	1	0	0	0	0	0	0
ENSGALG00000038278	272	311	243	224	322	349	3086	3611	2832	2472	2183	2067
ENSGALG00000038443	0	0	1	0	0	0	0	0	0	0	0	0
ENSGALG00000025679	1	2	2	0	1	1	1	2	3	1	0	0
ENSGALG00000030342	1114	1256	1264	1113	1851	1433	2371	2508	2324	2062	1984	1928
ENSGALG00000031149	14	21	15	13	20	9	23	22	18	12	16	28
ENSGALG00000031796	811	994	1067	983	1272	1039	1055	1076	999	842	996	901
ENSGALG00000041256	3	3	5	4	3	11	1	1	5	1	0	1
ENSGALG00000034147	0	0	0	0	0	0	0	0	0	0	0	0
ENSGALG00000035266	559	668	702	749	831	567	586	531	504	485	612	582
ENSGALG00000017362	27	46	24	25	46	38	22	25	27	9	23	20
ENSGALG00000005253	8	8	10	4	9	7	4	19	8	3	6	8
ENSGALG00000019527	3	3	7	2	6	3	3	1	2	2	0	3
ENSGALG00000030719	65	86	60	56	64	60	49	45	28	44	37	36
ENSGALG00000029240	13	20	25	23	19	28	4	11	12	7	3	14
ENSGALG00000035544	0	0	0	0	0	0	5	0	1	0	0	0
ENSGALG00000036931	764	933	869	734	1083	801	1595	1688	1569	1324	1448	1347
ENSGALG00000031944	927	1137	1291	1349	1585	1185	963	878	870	752	888	794
ENSGALG00000004322	211	257	283	245	299	266	591	612	484	439	387	384
ENSGALG00000002703	590	700	695	732	1065	840	1156	1231	1169	1003	1065	969
ENSGALG00000027853	129	198	181	149	199	150	210	183	190	158	163	153
ENSGALG00000031193	152	148	111	82	141	170	708	810	619	549	398	393
ENSGALG00000010612	722	845	1005	858	1134	873	862	852	672	662	812	736
ENSGALG00000040214	11	12	10	4	8	3	63	89	67	50	58	45
ENSGALG00000029451	0	0	1	1	0	0	0	2	1	0	0	2
ENSGALG00000010256	2263	2426	2693	2413	3522	2521	3662	3806	3824	2983	3443	3166
ENSGALG00000031749	0	0	0	0	0	0	0	0	0	0	0	0
ENSGALG00000038427	0	0	0	0	3	0	1	2	0	0	0	1
ENSGALG00000029374	0	0	0	0	0	0	0	0	0	0	0	0
ENSGALG00000024141	0	0	0	1	0	0	0	0	0	0	0	0
ENSGALG00000040318	0	0	0	1	1	0	1	1	0	0	0	1
ENSGALG00000040375	0	0	0	0	0	2	0	0	0	0	0	0
ENSGALG00000024041	110	160	102	126	167	157	360	451	405	335	298	322
ENSGALG00000015602	0	1	1	0	1	0	6	0	1	0	0	0
ENSGALG00000043747	0	0	0	0	0	0	0	0	0	0	0	0
ENSGALG00000010649	84	99	118	93	146	104	107	114	85	77	117	80
ENSGALG00000042417	3	3	1	0	0	2	1	0	1	1	2	1
ENSGALG00000031972	0	0	0	0	0	0	0	0	0	0	0	0
ENSGALG00000012170	1548	1736	1983	1828	2352	1739	1583	1358	1602	1205	1495	1359
ENSGALG00000041417	536	610	493	526	732	513	484	399	356	403	513	483
ENSGALG00000004065	500	500	640	565	766	586	544	568	569	462	536	471
ENSGALG00000006855	57	91	95	73	123	88	122	129	118	105	102	108
ENSGALG00000003134	12	25	18	12	18	16	52	48	47	27	41	28
ENSGALG00000038256	0	0	2	0	0	0	1	2	0	0	0	0
ENSGALG00000017052	2	2	4	10	7	5	3	3	5	1	2	1
ENSGALG00000007416	8	19	9	7	16	8	19	27	19	9	13	19
ENSGALG00000002367	1	1	1	0	1	0	0	0	0	1	1	0
ENSGALG00000043252	8	10	12	7	15	8	3	2	11	3	7	6
ENSGALG00000041377	7	6	10	11	11	8	1	6	9	6	3	8
ENSGALG00000010573	121	165	192	169	202	152	193	228	201	177	189	218
ENSGALG00000028316	2	0	3	0	1	3	5	2	3	0	3	1
ENSGALG00000031741	3698	4271	4522	3919	5984	4421	5966	6298	5813	4328	4740	4493
ENSGALG00000009691	0	1	0	0	0	0	0	0	0	0	0	0
ENSGALG00000032958	4	2	5	6	8	2	5	3	2	2	2	3
ENSGALG00000001690	1	1	0	5	11	2	2	2	1	1	1	0
ENSGALG00000040366	116	133	141	131	223	142	130	144	111	114	97	124
ENSGALG00000026876	0	0	0	0	0	0	1	2	0	0	0	0
ENSGALG00000010127	1894	2494	2305	2111	2809	2297	1776	1777	1871	1654	2252	1953
ENSGALG00000030179	114	107	88	93	114	113	186	220	183	161	186	148
ENSGALG00000031172	0	3	0	0	1	1	0	0	0	0	1	0
ENSGALG00000034495	6	3	5	0	9	4	39	42	33	30	23	33
ENSGALG00000043602	0	0	3	0	0	0	0	0	0	0	0	0
ENSGALG00000005357	4505	5534	5259	4804	6464	5207	6204	6175	5952	5262	6526	5936
ENSGALG00000009029	141	216	156	181	248	156	250	280	266	200	286	247
ENSGALG00000036780	0	3	1	7	0	4	0	3	2	0	1	1
ENSGALG00000033472	0	0	0	0	0	0	0	0	0	0	0	0
ENSGALG00000010057	27	40	38	33	63	29	34	26	21	28	26	29
ENSGALG00000043447	977	1208	1247	1176	1556	1120	1392	1395	1453	1169	1417	1318
ENSGALG00000043151	0	1	1	3	6	3	7	3	5	6	8	5
ENSGALG00000030016	5353	6348	4948	4250	6525	6419	14227	16455	13551	11341	12107	11227
ENSGALG00000043325	0	0	0	0	0	0	0	0	0	0	0	0
ENSGALG00000010678	1076	1412	1421	1333	1636	1215	1527	1516	1424	1195	1416	1327
ENSGALG00000025858	1140	1252	1294	1247	1765	1256	1129	1107	934	876	888	741
ENSGALG00000004034	4426	5399	4678	4467	5972	5244	7585	7567	7784	6462	7354	6959
ENSGALG00000029761	184	225	172	159	248	225	929	1017	851	741	605	632
ENSGALG00000003693	10556	12096	9484	7749	11483	11898	16233	17619	10915	12315	11200	10869
ENSGALG00000037239	0	0	0	0	0	0	0	0	0	0	0	0
ENSGALG00000042610	3	3	2	4	0	4	15	19	14	15	11	19
ENSGALG00000033009	60	83	68	52	75	68	141	175	127	118	100	101
ENSGALG00000031268	1	1	0	2	2	4	1	0	4	0	1	0
ENSGALG00000040034	62	81	95	71	105	98	66	72	62	47	70	56
ENSGALG00000026492	403	499	513	395	582	498	1403	1591	1369	1181	1105	1031
ENSGALG00000029506	0	0	0	0	0	0	0	0	0	0	0	0
ENSGALG00000013990	12475	16228	13015	12005	18216	16593	12372	11868	12823	11359	12005	11969
ENSGALG00000038882	1	1	1	5	9	1	314	327	212	228	171	170
ENSGALG00000036507	0	1	2	0	0	0	0	0	0	0	2	0
ENSGALG00000011267	1	1	3	0	2	1	1	0	1	1	2	0
ENSGALG00000018946	13	41	4	20	33	16	100	32	36	15	39	38
ENSGALG00000025184	2	6	2	2	4	8	5	10	5	7	3	7
ENSGALG00000038760	0	0	0	0	0	0	0	0	0	0	0	0
ENSGALG00000018281	0	0	0	0	0	0	1	3	1	0	0	1
ENSGALG00000034562	169	192	165	138	202	159	267	293	226	219	249	246
ENSGALG00000002690	292	319	345	294	440	356	600	693	430	456	386	376
ENSGALG00000004663	1285	1517	1685	1603	2097	1490	1288	1226	979	1079	1179	1078
ENSGALG00000000722	4	3	6	6	6	9	3	2	2	5	1	1
ENSGALG00000031158	2076	2700	2565	2217	3035	2430	2446	2541	2412	2294	2848	2664
ENSGALG00000043572	688	795	845	715	887	751	1060	1068	1072	923	1159	1077
ENSGALG00000009669	409	554	393	426	510	510	597	680	697	528	697	626
ENSGALG00000033752	0	1	0	1	0	0	0	0	1	1	0	0
ENSGALG00000034741	12	27	17	11	32	12	22	22	26	6	22	25
ENSGALG00000026650	3	0	4	0	3	3	0	0	3	0	2	0
ENSGALG00000017244	3225	3834	3774	3037	4541	3828	4798	5254	4701	4035	4498	3859
ENSGALG00000015322	33	58	43	30	72	22	120	52	61	48	48	61
ENSGALG00000017388	1209	1428	1507	1486	1775	1327	3292	3304	3105	2674	2812	2578
ENSGALG00000030972	0	0	0	0	0	0	0	0	0	0	0	0
ENSGALG00000024378	158	185	219	136	252	197	427	427	380	354	214	283
ENSGALG00000021762	1	2	1	5	0	6	3	3	3	0	3	2
ENSGALG00000016265	75	89	83	95	116	86	112	79	84	84	88	77
ENSGALG00000035046	14	17	19	14	24	20	84	106	76	88	56	71
ENSGALG00000041578	0	0	0	0	0	0	0	0	0	0	0	0
ENSGALG00000032469	103	108	55	57	87	98	370	468	296	269	281	217
ENSGALG00000010607	126	161	190	150	230	153	169	168	180	146	181	162
ENSGALG00000007653	1205	1438	1593	1468	1888	1302	1324	1230	1363	1072	1342	1194
ENSGALG00000030154	0	0	0	0	0	0	0	0	0	0	0	0
ENSGALG00000043121	150	195	181	164	211	180	214	196	192	161	150	173
ENSGALG00000039606	836	1027	1154	1013	1298	985	1166	1116	1172	922	1185	1038
ENSGALG00000039552	0	2	2	0	1	2	1	1	1	1	0	1
ENSGALG00000032953	1	0	0	0	0	0	0	0	0	1	0	0
ENSGALG00000037461	0	0	0	0	0	0	0	0	0	0	0	0
ENSGALG00000038045	0	0	0	0	0	0	0	0	0	0	0	0
ENSGALG00000041460	354	430	412	383	586	439	433	463	486	439	369	374
ENSGALG00000007786	31	41	29	29	39	33	35	31	23	23	38	35
ENSGALG00000017139	309	354	377	415	484	336	391	370	365	285	391	328
ENSGALG00000038976	0	0	0	0	0	0	0	0	0	0	0	0
ENSGALG00000001596	964	1128	1188	1032	1472	1112	1285	1219	1053	967	1129	954
ENSGALG00000025349	0	0	0	0	0	0	2	0	0	0	1	0
ENSGALG00000042208	0	0	0	0	0	0	0	0	0	0	0	0
ENSGALG00000012362	150	191	192	136	216	212	369	362	249	276	267	265
ENSGALG00000006108	670	749	851	759	1079	782	914	866	944	681	896	876
ENSGALG00000036297	5	6	3	0	3	4	15	22	15	21	16	16
ENSGALG00000037607	0	1	1	0	0	0	0	0	0	0	0	0
ENSGALG00000043482	173	249	277	268	336	219	271	248	257	192	216	209
ENSGALG00000032308	18	22	22	15	30	18	38	33	18	18	28	21
ENSGALG00000033324	3	1	0	4	7	6	7	1	0	2	1	4
ENSGALG00000016510	3	5	7	2	2	2	47	64	37	44	35	37
ENSGALG00000025093	2	7	2	4	9	3	2	3	4	1	1	3
ENSGALG00000015036	1492	1773	1951	1645	2346	1598	1753	1572	1558	1236	1525	1365
ENSGALG00000038526	1	4	1	5	3	6	1	1	0	0	2	0
ENSGALG00000040673	4	3	6	3	2	6	3	1	2	2	3	0
ENSGALG00000032462	541	662	757	701	921	609	728	718	814	598	722	639
ENSGALG00000027902	792	939	882	648	1077	1008	4575	4958	4131	3536	3092	2980
ENSGALG00000012244	1342	1603	1648	1452	2164	1603	2146	2201	2154	1661	1932	1804
ENSGALG00000037071	31	43	38	50	64	40	38	32	36	31	31	33
ENSGALG00000013943	1157	1429	1322	1294	1809	1381	2242	2277	2136	1761	1931	1723
ENSGALG00000041011	0	0	0	0	0	0	0	0	0	0	0	0
ENSGALG00000036389	10	11	1	1	3	4	202	256	142	155	128	103
ENSGALG00000033437	3	6	6	6	6	13	5	6	5	2	4	1
ENSGALG00000028081	13	8	7	9	15	13	37	33	19	15	12	20
ENSGALG00000038252	0	0	0	0	0	0	0	0	0	0	0	0
ENSGALG00000040624	13	11	25	21	38	11	23	29	14	21	17	23
ENSGALG00000032816	12	13	19	15	32	16	12	8	15	2	12	5
ENSGALG00000007127	572	699	729	582	864	723	1450	1648	1285	1252	1522	1311
ENSGALG00000039700	3	3	5	0	3	2	14	9	6	5	4	6
ENSGALG00000042778	0	0	0	0	0	0	0	0	0	0	0	0
ENSGALG00000016896	1536	1767	2014	1934	2552	1920	1230	1154	1024	960	1192	947
ENSGALG00000032860	51	61	56	60	84	72	74	65	96	44	63	71
ENSGALG00000012181	5	5	7	10	13	7	0	1	7	0	1	3
ENSGALG00000043804	19	14	17	21	31	21	4	4	5	3	5	2
ENSGALG00000036107	0	0	0	1	0	1	0	0	0	1	0	0
ENSGALG00000041310	0	0	0	0	0	0	0	0	0	0	0	0
ENSGALG00000011439	309	318	374	355	453	385	222	270	221	217	229	203
ENSGALG00000041268	0	0	0	0	0	0	0	0	0	0	0	0
ENSGALG00000000352	1508	1707	1754	1874	2575	1759	1628	1498	1619	1240	1372	1329
ENSGALG00000041078	76	71	80	62	104	106	720	750	631	531	525	455
ENSGALG00000011592	592	1033	637	779	1244	742	1661	1476	1458	1124	1511	1488
ENSGALG00000040474	506	622	694	645	941	614	647	703	597	510	642	578
ENSGALG00000036314	0	0	0	0	0	2	0	1	0	1	0	0
ENSGALG00000039438	114	110	147	125	154	107	72	83	76	66	85	77
ENSGALG00000028017	16	21	17	13	23	12	22	41	29	31	32	24
ENSGALG00000011643	1829	2112	2539	2389	3265	2206	1449	1278	1190	1090	1196	1199
ENSGALG00000025796	809	1069	1135	1046	1324	1070	1029	1091	1110	882	1126	1000
ENSGALG00000021340	77	126	92	75	137	123	206	251	165	169	167	160
ENSGALG00000032863	2	2	2	1	6	0	0	2	3	2	3	0
ENSGALG00000029590	0	0	0	0	0	0	0	0	0	0	0	0
ENSGALG00000029631	0	0	0	0	0	0	0	0	0	0	0	0
ENSGALG00000015013	770	907	775	664	1029	1046	2677	3203	2753	1880	1589	1390
ENSGALG00000032902	1	1	0	1	3	0	0	0	2	0	1	1
ENSGALG00000019201	777	921	1001	880	1222	917	873	804	896	709	936	825
ENSGALG00000033165	0	0	0	0	0	0	0	0	0	0	0	0
ENSGALG00000006861	160	218	200	188	285	171	452	412	397	319	356	333
ENSGALG00000015037	281	358	370	359	503	377	334	327	268	311	384	332
ENSGALG00000041466	0	0	0	0	0	0	0	0	0	0	0	0
ENSGALG00000010928	0	1	1	0	0	1	0	2	0	1	0	0
ENSGALG00000000920	4	6	2	3	8	4	60	74	36	39	42	39
ENSGALG00000043541	81	88	92	81	129	88	77	62	54	63	60	51
ENSGALG00000012984	7	4	10	0	6	1	7	7	9	9	6	5
ENSGALG00000006576	99	115	87	103	135	92	171	171	135	116	167	183
ENSGALG00000017321	80	103	90	79	106	130	388	483	379	324	350	332
ENSGALG00000005252	1	0	1	0	1	0	4	7	1	4	5	0
ENSGALG00000031466	18	17	39	23	33	19	5	11	10	8	6	1
ENSGALG00000040485	0	0	0	0	1	0	2	0	2	4	3	4
ENSGALG00000027869	0	0	0	0	0	0	0	0	0	0	0	0
ENSGALG00000043274	131	159	173	135	200	142	144	159	146	95	123	108
ENSGALG00000037175	0	0	0	0	0	0	0	0	0	0	0	0
ENSGALG00000002091	52	76	76	67	84	58	104	96	96	78	62	70
ENSGALG00000014754	0	0	3	0	2	0	1	0	0	0	0	0
ENSGALG00000030163	0	0	0	0	0	1	0	0	0	0	0	0
ENSGALG00000015163	191	234	220	193	259	230	288	358	261	252	311	273
ENSGALG00000021193	463	632	610	569	769	543	1571	1611	1620	1085	1358	1265
ENSGALG00000025935	0	4	2	2	2	4	8	11	3	6	7	1
ENSGALG00000034897	6	4	0	6	6	5	3	6	3	2	4	4
ENSGALG00000030001	0	0	0	0	0	0	0	0	0	0	0	0
ENSGALG00000031077	0	0	0	0	0	0	0	0	0	0	0	0
ENSGALG00000032691	0	4	2	2	5	3	2	4	4	1	3	2
ENSGALG00000039239	11	11	20	14	13	9	2	7	7	4	8	11
ENSGALG00000006829	3636	4328	4470	4119	5770	4161	3697	3475	2825	2624	3157	2863
ENSGALG00000038257	0	0	0	0	0	0	0	0	0	0	0	0
ENSGALG00000010694	547	672	688	709	941	617	618	535	490	528	556	519
ENSGALG00000000568	1	0	5	1	2	0	1	0	0	0	0	1
ENSGALG00000035665	0	0	0	0	0	0	1	0	2	0	0	2
ENSGALG00000041711	0	2	0	0	1	0	1	3	0	2	0	0
ENSGALG00000003935	134	159	147	129	231	172	218	189	235	166	239	214
ENSGALG00000016445	588	707	715	736	944	673	755	624	669	595	664	572
ENSGALG00000016426	27	23	33	29	37	30	18	13	14	15	22	21
ENSGALG00000008931	447	553	506	480	641	503	568	526	541	462	582	499
ENSGALG00000041778	372	471	491	489	840	551	292	230	299	215	183	187
ENSGALG00000040978	0	0	0	0	1	0	0	0	0	0	0	0
ENSGALG00000015084	1	4	7	9	13	5	24	29	18	21	14	24
ENSGALG00000000654	5	8	7	3	21	18	5	5	4	3	2	3
ENSGALG00000031766	2366	2553	2758	2563	3543	2734	3679	3403	3813	2912	3307	3032
ENSGALG00000007040	659	780	749	841	1136	808	887	1013	852	787	903	772
ENSGALG00000038281	0	0	0	0	0	1	0	0	0	0	0	0
ENSGALG00000003137	14	21	24	17	27	19	32	73	25	35	29	25
ENSGALG00000040066	2	7	7	3	4	9	13	7	6	9	11	6
ENSGALG00000042773	230	293	281	225	316	269	284	285	293	290	280	260
ENSGALG00000035204	1	10	4	9	8	6	6	6	5	4	1	4
ENSGALG00000031218	0	1	0	0	0	0	0	0	1	0	0	0
ENSGALG00000032450	3	1	1	0	2	1	6	1	0	3	3	2
ENSGALG00000025250	0	0	0	0	0	0	0	0	0	0	0	0
ENSGALG00000040690	0	1	0	0	0	0	0	1	0	0	0	0
ENSGALG00000016127	37	113	60	87	192	60	226	133	144	74	143	159
ENSGALG00000040080	158	149	97	69	136	183	757	813	636	575	499	482
ENSGALG00000005794	317	411	352	308	466	323	491	417	484	378	520	443
ENSGALG00000043077	0	0	0	0	0	0	0	0	0	0	0	0
ENSGALG00000031032	65	82	70	70	111	88	130	108	96	105	100	97
ENSGALG00000030836	6	6	11	10	6	2	12	12	9	8	5	14
ENSGALG00000034143	0	0	0	0	0	0	0	0	0	0	0	0
ENSGALG00000042728	1	1	1	1	0	2	1	0	1	1	0	2
ENSGALG00000036410	6	5	6	10	9	13	13	21	15	12	7	5
ENSGALG00000026009	2157	2591	2725	2643	3395	2395	3060	2911	3073	2405	2734	2487
ENSGALG00000001587	788	880	858	760	1097	983	1019	1014	982	797	1040	976
ENSGALG00000009650	11428	13860	14202	11963	16884	13082	14369	13955	11905	11805	12124	11813
ENSGALG00000003374	2	1	7	7	10	5	0	0	0	1	0	0
ENSGALG00000034328	479	585	617	467	796	545	979	1113	966	880	745	649
ENSGALG00000008744	211	273	259	283	339	224	287	209	208	183	251	206
ENSGALG00000006356	1252	1394	1542	1456	1988	1332	1602	1478	1552	1161	1427	1306
ENSGALG00000043683	0	0	0	1	0	0	12	7	0	1	4	3
ENSGALG00000007887	607	649	732	640	844	625	610	672	643	523	618	578
ENSGALG00000000629	331	348	326	236	422	383	534	540	526	393	427	382
ENSGALG00000007286	21	40	31	41	31	31	210	235	181	137	147	141
ENSGALG00000026557	51	69	48	29	34	85	2280	2918	1732	1968	1856	1830
ENSGALG00000034315	0	0	0	0	0	0	0	0	0	0	0	0
ENSGALG00000015390	844	901	851	905	1193	884	352	397	301	313	422	358
ENSGALG00000043298	0	0	0	0	0	0	0	0	0	0	0	0
ENSGALG00000031954	2	0	2	1	0	0	5	13	5	0	7	3
ENSGALG00000033996	141	169	176	161	238	151	195	195	176	152	188	149
ENSGALG00000031588	219	230	244	237	334	252	445	424	336	338	338	292
ENSGALG00000032054	179	369	199	114	270	349	585	734	485	488	148	144
ENSGALG00000042243	12	28	27	18	36	23	48	36	48	30	34	38
ENSGALG00000031524	97	117	131	104	131	117	152	158	121	179	191	131
ENSGALG00000027483	345	496	440	392	552	402	402	438	449	330	437	409
ENSGALG00000038843	0	0	0	0	0	0	0	0	0	0	0	0
ENSGALG00000010217	379	458	435	351	546	439	857	970	870	731	826	719
ENSGALG00000012816	58	44	69	44	84	59	46	56	37	17	22	24
ENSGALG00000016889	768	964	962	910	1089	877	873	922	789	762	954	859
ENSGALG00000034945	3	7	2	5	16	6	9	3	6	2	5	4
ENSGALG00000006891	28	43	31	18	50	31	57	57	46	35	68	40
ENSGALG00000034604	0	0	1	1	3	0	1	0	0	1	0	0
ENSGALG00000012583	74	120	106	104	132	115	143	156	129	117	150	121
ENSGALG00000041870	0	3	0	1	4	0	6	4	3	0	0	2
ENSGALG00000002773	1038	1323	1335	1151	1816	1353	1456	1401	1424	1202	1446	1243
ENSGALG00000031802	129	125	129	128	158	114	179	184	174	180	175	148
ENSGALG00000035535	1107	1304	1226	1168	1711	1227	1966	1952	1999	1450	1959	1748
ENSGALG00000010207	432	565	562	553	760	497	561	573	552	472	512	429
ENSGALG00000003636	44	73	79	52	74	87	317	388	296	189	210	187
ENSGALG00000005490	17910	21000	20631	18293	26251	22063	25387	24500	27582	22101	21852	22200
ENSGALG00000030320	51	107	87	73	86	57	153	184	146	114	125	125
ENSGALG00000007183	1849	2079	2071	1793	2638	2121	2374	2295	2453	1922	2390	2102
ENSGALG00000029460	0	2	1	3	9	6	0	1	1	3	1	0
ENSGALG00000030157	41	37	35	56	59	44	41	45	47	21	41	33
ENSGALG00000003169	970	1455	1160	1169	1706	1302	1595	1612	1457	1285	1671	1517
ENSGALG00000009791	135	144	144	123	191	135	125	136	122	95	97	80
ENSGALG00000035589	24	19	16	15	27	21	24	22	21	7	23	8
ENSGALG00000040573	42	68	65	51	64	54	82	70	68	50	79	49
ENSGALG00000037893	0	0	0	0	0	0	0	0	0	0	0	0
ENSGALG00000041165	112	174	136	117	216	165	345	342	270	247	276	266
ENSGALG00000030616	1	4	4	7	3	4	4	3	3	2	4	2
ENSGALG00000013971	817	1165	1313	1350	1774	1041	1501	1586	1554	1209	1536	1489
ENSGALG00000018251	0	0	0	0	0	0	0	0	0	0	0	0
ENSGALG00000031585	0	0	0	0	1	0	0	0	0	0	0	0
ENSGALG00000040418	0	8	6	5	9	8	31	30	20	17	20	23
ENSGALG00000018285	0	0	0	0	0	0	0	0	0	0	0	0
ENSGALG00000037227	0	0	0	0	0	0	0	0	0	0	0	0
ENSGALG00000034021	11	4	22	7	6	14	8	1	9	4	11	9
ENSGALG00000009071	2769	3419	3314	3157	4199	3486	3558	3287	3453	2994	3680	3441
ENSGALG00000014066	236	285	290	257	338	283	379	346	386	308	330	348
ENSGALG00000031590	14	11	17	26	18	9	10	13	16	21	17	18
ENSGALG00000003201	236	296	334	264	329	289	345	350	318	300	340	334
ENSGALG00000034239	0	0	0	0	0	0	0	0	0	0	0	0
ENSGALG00000026817	6	8	7	12	7	8	6	6	2	4	4	2
ENSGALG00000040007	5	13	6	4	5	1	6	1	3	4	7	2
ENSGALG00000030304	0	0	0	0	0	0	0	0	0	0	0	0
ENSGALG00000042112	1977	2431	2586	2506	3233	2361	2177	2053	2393	1898	2431	2106
ENSGALG00000032807	85	96	94	104	112	91	71	75	90	73	105	103
ENSGALG00000034106	0	0	0	0	0	0	0	0	0	0	0	0
ENSGALG00000008933	98	133	151	119	209	107	471	489	550	398	382	397
ENSGALG00000021774	0	0	0	0	0	0	0	0	0	0	0	0
ENSGALG00000007926	1253	1655	1429	1222	1777	1601	2373	2415	2260	1886	2243	2131
ENSGALG00000031652	2	1	2	0	4	2	2	2	2	1	3	1
ENSGALG00000024405	2	0	1	0	1	1	0	0	0	0	0	0
ENSGALG00000011269	0	0	1	2	2	0	0	0	0	0	0	1
ENSGALG00000032766	0	0	0	0	0	0	0	0	1	0	0	0
ENSGALG00000008382	1545	1669	1757	1651	2123	1648	2775	2854	2711	2086	2683	2445
ENSGALG00000040384	0	3	1	0	3	0	1	2	0	0	0	0
ENSGALG00000004325	5983	7832	6883	5674	7747	7109	7074	7351	6226	6729	8111	7351
ENSGALG00000034932	602	723	742	649	981	739	944	994	785	838	860	824
ENSGALG00000031984	0	0	0	0	0	0	0	0	0	0	0	0
ENSGALG00000022557	0	1	0	0	4	0	2	5	1	0	1	1
ENSGALG00000015240	224	296	329	240	329	268	576	684	580	392	506	451
ENSGALG00000007665	99	126	100	80	107	117	232	267	168	199	198	164
ENSGALG00000009067	17	4	13	5	13	10	14	12	5	5	10	11
ENSGALG00000010148	1	3	0	1	3	2	1	2	0	0	1	1
ENSGALG00000030934	2	3	2	0	3	2	1	2	5	1	1	2
ENSGALG00000028018	6	7	2	7	16	11	11	14	8	6	5	6
ENSGALG00000008834	2	8	3	2	4	3	3	0	0	0	2	1
ENSGALG00000034022	0	0	0	0	0	0	0	0	0	0	0	0
ENSGALG00000009034	17	16	21	21	22	7	28	37	26	21	23	25
ENSGALG00000041923	250	335	241	191	351	387	816	900	611	719	554	598
ENSGALG00000036540	8	9	8	6	16	7	4	7	4	1	6	5
ENSGALG00000033846	0	0	0	0	0	0	0	0	0	0	0	0
ENSGALG00000025962	0	0	0	0	0	0	0	1	0	0	0	0
ENSGALG00000008765	764	897	952	921	1123	813	976	898	1131	798	1071	910
ENSGALG00000003427	981	1141	1218	1133	1502	1162	1150	1173	1101	961	1200	1038
ENSGALG00000035222	17	25	40	26	28	36	33	26	22	30	40	26
ENSGALG00000009954	265	325	344	343	376	317	387	345	312	313	365	341
ENSGALG00000033628	3	2	6	0	5	2	0	2	1	1	0	0
ENSGALG00000026120	0	0	0	0	0	0	0	0	0	0	0	0
ENSGALG00000015364	7	1	2	5	11	1	1	1	1	2	2	5
ENSGALG00000003580	6870	9528	8292	8902	12386	9016	9440	9886	9423	8846	12352	10249
ENSGALG00000042458	56512	64932	69857	57115	80899	62028	81395	81592	76076	65163	69615	65791
ENSGALG00000039609	6	13	21	16	30	22	38	44	51	24	22	22
ENSGALG00000030437	0	0	0	0	0	0	0	0	0	0	0	0
ENSGALG00000026932	0	0	0	0	0	0	0	0	0	0	0	0
ENSGALG00000009709	268	350	296	310	393	327	671	680	584	577	595	530
ENSGALG00000043438	0	0	0	0	0	0	0	0	0	0	0	0
ENSGALG00000030769	14	23	23	17	25	13	28	24	22	26	27	18
ENSGALG00000043799	58	89	68	57	88	74	133	127	101	101	115	106
ENSGALG00000001618	161	168	180	165	204	189	175	188	123	158	139	151
ENSGALG00000015248	2	3	1	2	10	1	2	2	1	3	0	0
ENSGALG00000014952	353	453	407	399	574	392	665	643	648	538	631	609
ENSGALG00000012546	268	402	273	268	359	415	1223	1377	1066	1067	1045	996
ENSGALG00000025261	0	0	0	0	0	0	0	0	0	0	0	0
ENSGALG00000033672	271	304	324	236	322	315	544	523	426	405	366	356
ENSGALG00000024271	141	161	143	107	172	177	790	905	770	678	669	613
ENSGALG00000033078	19	22	25	30	33	29	30	29	26	12	18	22
ENSGALG00000035377	0	0	0	0	0	0	0	0	0	0	0	0
ENSGALG00000040701	0	0	0	0	0	0	0	0	0	0	0	0
ENSGALG00000033050	1	0	0	0	4	1	0	0	0	0	0	0
ENSGALG00000033026	2847	2632	1549	1609	2656	3696	306	261	316	245	272	167
ENSGALG00000042513	0	0	0	0	0	0	0	0	0	1	0	0
ENSGALG00000014159	1692	2064	1971	2202	2886	2040	1834	1796	1721	1371	2004	1611
ENSGALG00000028659	1	5	1	2	3	3	4	8	3	8	4	3
ENSGALG00000025425	0	4	1	0	0	0	0	2	0	0	0	0
ENSGALG00000029276	65	58	34	31	41	74	2185	2481	1849	1849	1461	1524
ENSGALG00000025276	0	4	0	0	3	4	1	3	1	1	1	2
ENSGALG00000037824	0	0	0	0	0	0	0	0	0	0	0	0
ENSGALG00000039263	33	29	30	20	51	37	76	76	98	57	68	54
ENSGALG00000039542	13	10	2	4	7	13	53	73	60	44	16	14
ENSGALG00000005649	148	164	149	100	140	170	519	688	453	421	368	370
ENSGALG00000036897	5	12	11	7	20	6	25	30	35	18	18	24
ENSGALG00000000611	631	629	804	687	981	664	1470	1591	1263	1104	1124	1029
ENSGALG00000036160	1	2	2	7	6	2	3	2	0	1	1	0
ENSGALG00000032696	0	2	0	2	8	2	0	0	1	0	0	0
ENSGALG00000037810	140	102	102	88	118	78	22	32	19	25	18	15
ENSGALG00000042486	0	0	0	0	2	0	0	0	0	0	0	0
ENSGALG00000003221	586	666	733	656	885	704	804	781	789	650	744	644
ENSGALG00000034688	10	24	5	5	7	11	112	170	88	111	78	93
ENSGALG00000039871	0	0	0	0	0	0	0	0	0	0	0	0
ENSGALG00000002813	7901	10229	9904	9145	13497	10548	9460	9406	10280	7780	8312	8417
ENSGALG00000006017	195	269	223	203	316	236	177	240	177	192	228	196
ENSGALG00000038909	0	0	0	0	1	0	0	0	0	0	0	0
ENSGALG00000004622	272	345	391	332	491	345	535	530	516	423	397	445
ENSGALG00000034128	0	0	0	1	0	1	0	0	0	0	0	0
ENSGALG00000043527	0	2	0	1	2	5	2	2	0	0	3	1
ENSGALG00000042481	306	343	380	338	467	284	435	482	504	380	447	381
ENSGALG00000038327	2	2	1	2	1	2	0	5	0	3	2	1
ENSGALG00000016677	0	0	0	0	0	0	0	0	0	0	0	0
ENSGALG00000006796	377	450	436	275	476	466	1003	1212	1013	840	758	672
ENSGALG00000027056	5	7	10	5	5	13	14	7	14	11	9	13
ENSGALG00000000839	3	15	7	6	12	3	7	7	2	9	3	3
ENSGALG00000042278	15	5	16	10	21	13	4	8	6	4	3	6
ENSGALG00000012814	431	502	570	446	713	543	750	780	778	622	737	666
ENSGALG00000031134	1546	1850	1942	1669	2327	1824	2410	2538	2309	2066	2263	2034
ENSGALG00000001055	1644	1797	1983	1926	2739	1960	2374	2231	2213	1926	2229	2100
ENSGALG00000031481	0	0	0	0	0	0	0	0	0	0	0	0
ENSGALG00000002167	15	38	33	18	31	38	562	654	538	384	379	355
ENSGALG00000043761	82	86	39	37	61	114	352	388	180	235	201	175
ENSGALG00000028177	2	1	2	1	2	1	0	1	0	0	0	0
ENSGALG00000005781	1096	1244	1273	1123	1430	1284	1253	1268	1172	1074	1258	1143
ENSGALG00000032256	0	0	0	1	0	0	0	0	0	0	0	0
ENSGALG00000020410	268	305	285	258	349	286	395	442	373	331	317	290
ENSGALG00000011275	94	116	135	119	137	119	118	129	129	117	169	132
ENSGALG00000032635	0	0	0	0	3	0	0	0	0	0	0	0
ENSGALG00000028010	1	2	5	1	0	1	0	0	0	0	2	0
ENSGALG00000038374	20	19	17	11	23	21	33	19	21	22	18	19
ENSGALG00000039582	0	0	1	1	2	0	1	1	0	0	1	0
ENSGALG00000041072	305	397	346	378	507	408	397	365	378	306	390	392
ENSGALG00000010624	1585	1811	1935	1855	2333	1777	2062	1984	2019	1749	2038	1831
ENSGALG00000038304	4	16	8	7	15	4	9	8	8	6	14	5
ENSGALG00000016043	2	2	0	1	1	2	2	3	6	1	2	1
ENSGALG00000018415	1	2	0	2	3	4	2	2	2	2	0	0
ENSGALG00000042585	310	344	368	348	427	358	274	263	269	202	301	259
ENSGALG00000002581	9	13	5	5	4	10	97	123	80	83	80	63
ENSGALG00000016475	3	4	5	9	6	4	5	8	3	2	3	1
ENSGALG00000040431	0	0	0	1	0	0	0	1	0	0	0	0
ENSGALG00000031087	0	0	0	0	0	0	0	0	0	0	0	0
ENSGALG00000031136	0	8	0	1	2	1	1	2	0	1	1	3
ENSGALG00000030557	8	8	15	13	10	7	5	14	5	6	5	6
ENSGALG00000005668	6304	7864	8649	7805	10045	7415	8554	8368	8317	6286	8069	7439
ENSGALG00000037044	0	0	0	0	0	0	0	0	0	0	0	0
ENSGALG00000006001	2090	2438	2554	2105	3132	2365	2995	3063	2651	2258	2545	2343
ENSGALG00000043660	6	6	10	5	8	11	7	2	1	2	2	0
ENSGALG00000040116	146	197	174	164	221	203	588	685	473	380	257	269
ENSGALG00000004840	3	5	3	6	6	2	9	3	8	7	6	4
ENSGALG00000015377	2429	2839	2643	2526	3390	2442	2075	1806	1663	1737	2042	1851
ENSGALG00000041871	0	1	3	0	0	2	0	0	0	0	0	0
ENSGALG00000043515	4	7	1	9	6	3	3	7	5	2	3	5
ENSGALG00000016564	68	57	43	52	75	65	67	94	67	42	48	43
ENSGALG00000001792	1	0	0	0	2	0	23	38	24	16	18	26
ENSGALG00000030146	15	22	17	7	17	15	9	15	11	5	5	7
ENSGALG00000031686	0	0	0	0	0	0	0	0	0	0	0	0
ENSGALG00000013952	206	264	251	192	303	218	318	321	260	243	336	284
ENSGALG00000029334	31	29	12	10	33	37	159	153	131	134	94	89
ENSGALG00000033856	169	236	196	209	288	214	215	237	195	178	200	178
ENSGALG00000032756	0	0	1	1	1	1	0	0	2	0	0	0
ENSGALG00000033180	0	0	1	0	0	0	0	1	1	0	1	0
ENSGALG00000010150	2494	2828	2881	2560	3438	2960	3203	3183	2842	2615	3090	2787
ENSGALG00000039490	0	0	0	0	0	0	0	0	0	0	0	0
ENSGALG00000015902	1	0	3	1	0	2	1	0	0	0	0	0
ENSGALG00000031900	7	5	5	6	8	8	11	7	7	11	9	6
ENSGALG00000037004	2	3	3	5	6	4	3	4	4	2	1	4
ENSGALG00000035871	0	0	0	0	0	0	0	0	0	0	0	0
ENSGALG00000035256	2	2	4	2	1	4	0	2	5	0	2	2
ENSGALG00000041302	1109	1361	1492	1467	1961	1319	1219	1126	1166	1059	1189	1073
ENSGALG00000033299	0	0	0	0	1	1	0	0	0	0	0	0
ENSGALG00000007550	189	272	240	220	285	220	216	293	237	183	235	221
ENSGALG00000000638	340	390	369	295	479	428	1102	1084	998	835	634	575
ENSGALG00000040605	113	143	135	112	161	149	202	214	205	169	153	135
ENSGALG00000015117	3	3	4	0	3	3	6	5	2	2	6	2
ENSGALG00000010174	837	1022	934	766	1321	1025	2836	3607	2735	2134	1826	1747
ENSGALG00000042937	0	0	0	0	0	0	0	0	0	0	0	0
ENSGALG00000043375	0	0	0	0	0	0	0	0	0	0	0	0
ENSGALG00000029773	0	0	1	0	0	0	0	0	0	0	0	0
ENSGALG00000006995	4	1	1	3	5	5	5	6	4	8	4	3
ENSGALG00000028181	1	0	0	0	0	0	0	0	0	0	1	0
ENSGALG00000008827	142	148	158	335	376	212	182	196	193	87	158	97
ENSGALG00000034824	9	8	11	11	14	18	7	20	6	6	9	9
ENSGALG00000006851	3354	3479	3788	3379	4187	3373	3486	3023	2980	2479	2947	3085
ENSGALG00000042790	0	0	0	0	0	0	0	0	0	0	0	0
ENSGALG00000007041	293	323	328	440	472	369	292	301	297	259	309	283
ENSGALG00000040023	270	330	348	333	440	240	444	447	448	342	393	373
ENSGALG00000023083	47	55	50	50	42	52	66	44	33	34	52	45
ENSGALG00000040528	361	463	488	429	690	441	925	885	849	698	619	662
ENSGALG00000025191	0	0	0	0	0	0	0	0	0	0	0	0
ENSGALG00000001550	2239	2762	2748	2719	3609	2675	3384	3365	3139	2691	3029	2689
ENSGALG00000034633	3	3	6	2	3	1	2	5	0	1	1	0
ENSGALG00000031513	0	0	0	0	0	0	0	0	0	0	0	0
ENSGALG00000009703	377	478	355	358	485	497	1066	1200	1011	782	860	760
ENSGALG00000041995	0	0	0	0	0	0	0	0	0	0	0	0
ENSGALG00000037556	329	341	345	319	414	292	165	171	167	111	161	136
ENSGALG00000027170	163	175	179	171	231	168	159	123	98	135	147	132
ENSGALG00000031051	124	164	151	131	216	162	368	334	337	247	241	243
ENSGALG00000003759	41	73	54	43	94	53	36	26	37	33	32	20
ENSGALG00000034481	0	0	0	0	0	0	0	0	0	0	0	0
ENSGALG00000017159	1009	1251	1302	1372	1729	1195	813	750	710	627	828	713
ENSGALG00000031969	0	4	1	3	4	3	0	0	3	0	0	1
ENSGALG00000035339	0	0	0	0	0	0	0	0	0	0	0	0
ENSGALG00000037757	0	0	0	0	0	0	0	0	0	0	0	0
ENSGALG00000003705	1678	1849	1920	1864	2637	1923	1066	950	851	782	998	947
ENSGALG00000031004	4	6	14	10	7	15	7	5	8	1	5	7
ENSGALG00000002500	191	190	148	102	161	238	1666	1925	1509	1464	1419	1254
ENSGALG00000015951	390	396	463	452	590	494	311	336	311	260	337	260
ENSGALG00000033693	0	0	0	0	0	0	0	0	0	0	0	0
ENSGALG00000032302	6	7	3	7	5	0	5	4	4	2	3	5
ENSGALG00000015416	486	553	649	630	814	550	809	699	808	655	835	656
ENSGALG00000009957	18	30	18	16	16	28	24	15	30	15	16	18
ENSGALG00000039423	0	0	0	0	0	0	0	0	0	0	0	0
ENSGALG00000038235	0	0	0	0	0	0	0	0	0	0	0	0
ENSGALG00000036050	0	1	0	0	0	0	0	1	0	0	0	0
ENSGALG00000034375	0	0	0	0	0	0	0	0	0	0	0	0
ENSGALG00000034895	7	2	4	2	7	6	59	70	43	42	34	28
ENSGALG00000038425	2	1	0	0	5	1	4	6	5	8	0	5
ENSGALG00000031874	841	906	770	667	1045	1007	6819	7405	6453	5108	4995	4745
ENSGALG00000036134	0	0	0	0	0	0	0	0	0	0	0	0
ENSGALG00000040890	1	0	0	3	0	0	18	24	14	26	16	10
ENSGALG00000029273	1	0	1	0	0	0	0	0	0	0	0	0
ENSGALG00000032533	99	138	131	108	189	157	176	186	145	142	129	128
ENSGALG00000030003	857	998	958	781	1176	1090	2353	2480	2300	1845	1763	1664
ENSGALG00000035989	0	2	0	1	0	0	0	0	0	0	0	0
ENSGALG00000023576	1485	1621	1829	1749	2523	1744	5127	5184	4785	3499	3123	3019
ENSGALG00000029723	0	0	0	0	0	0	0	0	0	0	0	0
ENSGALG00000037825	0	0	0	0	0	0	0	0	0	0	0	0
ENSGALG00000035269	0	1	0	0	0	0	0	0	0	0	0	1
ENSGALG00000015415	1232	1386	1599	1390	1972	1391	1458	1426	1446	1189	1487	1228
ENSGALG00000002707	25	33	34	20	44	48	84	110	83	74	52	67
ENSGALG00000030903	1	2	1	1	1	0	3	0	3	2	4	2
ENSGALG00000042687	14	16	17	15	19	15	13	5	8	9	4	7
ENSGALG00000010760	7	6	8	11	14	13	0	4	3	4	3	0
ENSGALG00000039561	0	0	0	0	0	0	0	0	0	0	0	0
ENSGALG00000042829	17	19	29	29	23	19	13	13	21	5	14	13
ENSGALG00000029850	362	349	319	239	392	456	2106	2424	2063	1775	1562	1456
ENSGALG00000042260	0	0	0	0	0	0	0	0	0	0	0	0
ENSGALG00000029757	0	2	0	0	0	0	10	21	6	10	7	7
ENSGALG00000010093	601	738	707	650	798	665	979	1020	988	888	1144	997
ENSGALG00000035312	37	57	41	27	63	40	41	34	30	44	35	30
ENSGALG00000040750	0	0	0	0	0	0	0	0	0	0	0	0
ENSGALG00000039056	2	1	1	0	2	2	15	14	16	10	4	15
ENSGALG00000038506	0	1	0	0	0	5	3	3	4	2	4	4
ENSGALG00000041975	1	0	0	0	0	0	0	0	0	0	0	0
ENSGALG00000005057	504	574	602	606	810	552	691	614	672	531	668	579
ENSGALG00000004236	372	509	250	398	547	509	638	612	579	540	724	542
ENSGALG00000030924	7	7	4	11	4	2	2	1	3	0	5	0
ENSGALG00000013615	329	418	411	413	538	372	477	527	499	372	509	406
ENSGALG00000017196	828	961	1123	1066	1345	928	1372	1354	1068	1016	1139	1054
ENSGALG00000041065	15	15	27	15	24	31	39	18	22	21	36	40
ENSGALG00000040674	3	3	7	4	3	3	0	1	2	0	0	0
ENSGALG00000039211	0	2	0	0	0	0	0	0	1	1	0	0
ENSGALG00000016779	168	206	230	206	252	213	540	661	471	459	436	365
ENSGALG00000035668	2	3	5	0	3	4	1	3	1	0	0	0
ENSGALG00000039812	0	1	0	0	0	0	2	1	0	3	5	4
ENSGALG00000009514	18	51	41	47	49	43	24	21	13	18	28	17
ENSGALG00000039916	1	3	2	1	2	1	1	1	0	0	3	1
ENSGALG00000001722	501	583	692	641	836	588	817	905	760	663	728	688
ENSGALG00000043129	563	689	569	458	684	727	2048	2240	2050	1572	1357	1393
ENSGALG00000036304	12	17	21	19	26	12	25	27	31	20	44	35
ENSGALG00000030472	0	0	0	0	0	0	0	0	0	0	0	0
ENSGALG00000021688	89	128	117	109	144	136	166	177	182	150	164	116
ENSGALG00000005316	456	583	515	587	750	572	504	442	473	468	408	442
ENSGALG00000010854	357	417	428	471	645	436	512	448	452	322	429	416
ENSGALG00000035450	0	0	0	0	0	0	0	0	0	0	0	0
ENSGALG00000025789	1	7	3	5	3	2	5	3	2	2	4	0
ENSGALG00000021304	0	0	0	1	13	4	3	0	5	1	1	2
ENSGALG00000035842	121	165	115	115	198	163	258	284	225	212	189	181
ENSGALG00000041471	5566	6799	6081	4621	7939	7563	21483	25968	18664	17381	10945	12099
ENSGALG00000043692	0	0	0	0	0	0	0	0	0	0	0	0
ENSGALG00000026757	93	103	88	96	114	99	94	90	89	72	113	98
ENSGALG00000009307	535	662	502	607	855	652	684	588	706	550	696	569
ENSGALG00000027683	0	0	0	0	0	0	0	0	0	0	0	0
ENSGALG00000011533	257	300	310	269	414	312	423	429	376	319	390	319
ENSGALG00000007037	2134	2517	2611	2622	3602	2530	2365	2238	2216	1863	2319	2130
ENSGALG00000041215	7	4	5	1	6	11	344	421	256	206	143	174
ENSGALG00000038128	1943	2275	2469	2328	3056	2223	3229	2977	3215	2455	3050	2878
ENSGALG00000007001	142	199	119	202	267	169	54	53	47	17	52	37
ENSGALG00000011244	12	7	7	6	17	11	5	8	6	9	4	5
ENSGALG00000018557	32	46	30	37	55	28	85	74	76	75	80	72
ENSGALG00000037349	2	1	3	2	1	4	6	6	5	3	9	8
ENSGALG00000034344	618	805	657	618	875	720	1354	1502	1337	1306	1476	1271
ENSGALG00000015864	1004	1228	1269	984	1320	1059	1171	1140	940	966	1275	1079
ENSGALG00000025842	3574	4453	3776	3017	4459	4319	16361	16859	15580	12780	13259	12921
ENSGALG00000033169	156	212	173	149	241	211	45	42	56	33	17	20
ENSGALG00000032975	85	134	117	110	167	128	236	233	202	182	212	186
ENSGALG00000007203	278	314	285	275	442	336	377	424	368	346	343	310
ENSGALG00000033954	597	696	704	562	795	661	1328	1355	1100	1031	1164	1070
ENSGALG00000001191	21	20	25	14	36	28	16	12	16	13	15	7
ENSGALG00000012978	206	285	246	246	327	215	280	328	273	237	297	280
ENSGALG00000035239	625	743	840	854	1179	771	1547	1657	1581	1194	1316	1065
ENSGALG00000026804	0	0	0	0	2	1	0	0	0	0	0	0
ENSGALG00000025300	1	2	2	0	3	3	8	14	7	3	6	7
ENSGALG00000010811	9107	11172	10954	10904	14779	11032	12439	12994	13209	10555	13959	12022
ENSGALG00000042775	0	0	0	0	0	0	0	0	0	0	0	0
ENSGALG00000042464	0	0	0	0	0	0	0	0	0	0	0	0
ENSGALG00000042627	0	0	0	3	0	0	0	0	0	0	0	0
ENSGALG00000033057	0	0	0	0	0	0	0	0	0	0	0	0
ENSGALG00000010736	2	13	18	4	12	16	7	10	10	8	8	6
ENSGALG00000008591	27	36	23	25	38	35	19	13	23	10	23	14
ENSGALG00000041927	83	83	67	68	81	87	629	684	492	464	348	382
ENSGALG00000005985	1	5	1	2	2	0	1	0	3	2	0	3
ENSGALG00000007470	237	266	230	235	341	286	371	317	353	272	333	306
ENSGALG00000036292	0	0	2	2	1	0	0	0	0	0	0	0
ENSGALG00000029266	561	701	647	606	765	679	811	884	898	722	977	736
ENSGALG00000031875	98	86	125	101	128	124	138	142	148	124	138	102
ENSGALG00000028026	588	791	826	719	1055	804	914	913	881	726	932	842
ENSGALG00000032649	0	0	0	0	0	0	0	0	0	0	0	0
ENSGALG00000029509	7	13	12	6	5	14	14	10	9	10	16	5
ENSGALG00000029798	0	0	0	0	0	0	0	0	0	0	0	0
ENSGALG00000002882	309	384	381	351	537	327	507	458	521	398	408	392
ENSGALG00000038453	0	0	0	0	0	0	0	0	0	0	0	0
ENSGALG00000032524	2	5	0	2	2	6	2	2	1	2	1	4
ENSGALG00000016052	346	420	425	426	561	415	469	490	492	390	497	457
ENSGALG00000001117	129	135	165	169	226	117	165	231	190	158	180	170
ENSGALG00000007412	50	48	66	55	66	56	124	141	114	105	135	103
ENSGALG00000018317	0	2	0	0	0	1	3	0	0	1	1	0
ENSGALG00000037533	1	1	0	1	2	1	1	0	1	0	1	0
ENSGALG00000003158	173	248	240	181	291	237	819	822	802	671	715	660
ENSGALG00000038095	14	19	18	24	24	14	14	19	21	19	16	16
ENSGALG00000014116	109	176	172	118	187	141	425	442	378	346	383	382
ENSGALG00000041250	0	0	0	0	0	0	0	0	0	0	0	0
ENSGALG00000011724	555	669	679	654	910	711	1273	1317	1196	1004	1073	967
ENSGALG00000037336	52	62	84	61	54	54	30	50	40	36	34	35
ENSGALG00000032747	0	0	0	0	0	0	0	0	0	0	0	0
ENSGALG00000003690	36	40	38	27	46	31	370	419	351	229	221	258
ENSGALG00000042466	0	1	3	2	0	9	1	0	0	0	1	0
ENSGALG00000035400	0	1	3	0	3	0	0	0	0	0	0	0
ENSGALG00000043653	18	16	14	13	18	18	5	4	4	1	5	6
ENSGALG00000007656	0	0	0	0	0	0	0	0	0	0	0	0
ENSGALG00000036700	0	1	1	1	8	3	0	0	0	0	0	0
ENSGALG00000012525	708	958	869	870	1211	930	1345	1465	1122	1141	1238	1016
ENSGALG00000042901	0	0	1	0	0	0	0	0	0	0	0	0
ENSGALG00000039169	138	149	159	148	232	146	249	278	257	216	258	250
ENSGALG00000014877	44	57	56	54	60	47	56	35	57	40	74	39
ENSGALG00000016058	771	1004	1068	1078	1447	987	1066	1091	1021	820	948	849
ENSGALG00000036453	0	0	0	0	0	0	0	0	0	0	0	0
ENSGALG00000038000	1	0	1	5	5	4	2	1	0	0	0	0
ENSGALG00000033678	2363	2975	2610	2636	3866	2875	4238	4284	3493	3389	3499	3412
ENSGALG00000035890	5	0	1	1	2	1	1	1	0	0	1	1
ENSGALG00000043062	0	0	1	0	1	1	0	0	0	0	0	0
ENSGALG00000042601	0	0	0	0	0	0	0	0	0	0	0	0
ENSGALG00000009802	424	531	515	487	615	476	642	687	686	549	687	580
ENSGALG00000040383	0	0	3	0	1	0	1	1	0	1	1	4
ENSGALG00000017092	734	817	882	905	1196	828	788	730	692	571	669	626
ENSGALG00000042866	1	9	6	8	10	4	18	21	11	5	15	6
ENSGALG00000041584	1	0	4	0	0	0	1	0	3	0	0	1
ENSGALG00000010773	169	186	210	207	315	195	238	313	229	196	205	187
ENSGALG00000040219	0	0	0	0	0	0	0	0	0	0	0	0
ENSGALG00000041311	0	0	0	0	0	1	0	0	1	0	0	1
ENSGALG00000042877	1	15	7	7	8	10	125	203	146	110	105	103
ENSGALG00000033441	28	43	30	26	55	53	538	502	410	370	463	342
ENSGALG00000030234	7	7	10	7	25	14	32	23	16	13	14	9
ENSGALG00000037107	0	0	0	0	0	1	0	0	0	0	0	0
ENSGALG00000042361	42	22	21	8	18	35	459	526	382	362	234	211
ENSGALG00000036934	0	0	0	0	0	0	0	0	0	0	0	0
ENSGALG00000008689	325	368	386	347	438	345	388	309	304	337	382	347
ENSGALG00000035492	1318	1472	1722	1515	2128	1625	1604	1721	1664	1282	1629	1355
ENSGALG00000009693	0	11	6	6	4	8	15	19	11	5	9	9
ENSGALG00000005844	18	9	14	7	17	10	30	36	17	34	17	18
ENSGALG00000038941	230	212	106	99	174	278	2201	2678	2021	1777	1498	1503
ENSGALG00000036978	0	0	0	0	0	0	0	0	0	0	0	0
ENSGALG00000012370	1123	1529	1440	1367	1914	1421	1996	2072	2132	1611	2158	1940
ENSGALG00000029047	223	259	273	204	310	324	537	622	518	444	472	427
ENSGALG00000032325	0	0	0	0	0	0	0	0	0	0	0	0
ENSGALG00000032611	26	18	42	34	46	36	43	56	50	33	37	34
ENSGALG00000041229	0	0	1	3	0	1	2	0	1	1	0	0
ENSGALG00000011368	399	451	489	429	673	429	473	459	474	364	429	402
ENSGALG00000007914	848	1046	779	815	1140	997	1509	1564	1518	1315	1577	1367
ENSGALG00000019941	2	1	2	0	4	1	0	2	1	0	2	1
ENSGALG00000038651	308	370	287	252	366	376	918	868	952	678	639	636
ENSGALG00000020151	8	25	13	22	31	24	41	31	41	40	50	26
ENSGALG00000034432	17	16	18	14	19	10	7	9	2	7	6	7
ENSGALG00000042804	60	84	70	34	81	91	528	646	467	405	294	306
ENSGALG00000033742	31	47	49	36	61	43	36	33	32	31	25	18
ENSGALG00000039818	3831	4137	4039	3570	4927	4308	5462	5906	4136	4584	4544	4332
ENSGALG00000031819	0	0	0	0	0	0	0	0	0	0	0	0
ENSGALG00000025600	0	0	0	0	0	0	0	0	0	0	0	0
ENSGALG00000001921	45	81	71	57	89	66	176	211	175	149	134	140
ENSGALG00000026531	634	731	683	642	920	715	1474	1482	1422	1195	1424	1194
ENSGALG00000025522	1	0	0	1	0	1	0	0	0	0	0	0
ENSGALG00000014881	216	258	263	251	280	218	242	253	251	197	232	207
ENSGALG00000040374	0	0	0	0	0	0	0	0	0	0	0	0
ENSGALG00000016491	2	3	6	7	2	4	1	1	1	0	0	2
ENSGALG00000029046	0	1	1	0	3	0	1	0	0	2	0	0
ENSGALG00000000814	2662	3181	3324	3091	4092	3192	4088	3870	3862	3225	3837	3438
ENSGALG00000009097	1783	1945	2009	2037	2751	1968	2219	2143	2122	1661	2187	1926
ENSGALG00000040199	0	0	0	0	1	0	0	0	0	0	0	1
ENSGALG00000009861	21	11	10	11	14	13	17	17	11	11	12	16
ENSGALG00000013621	714	813	804	952	1277	887	987	1005	957	780	964	827
ENSGALG00000014038	474	602	582	547	743	555	604	682	683	569	628	664
ENSGALG00000036718	70	100	88	85	135	82	91	71	90	76	88	71
ENSGALG00000024266	4	10	14	11	17	20	3	5	3	3	4	4
ENSGALG00000001096	564	649	721	615	965	685	789	696	741	603	716	686
ENSGALG00000005323	0	0	0	0	2	0	0	1	0	0	0	0
ENSGALG00000025149	0	0	0	0	0	0	0	1	0	0	0	0
ENSGALG00000030574	0	0	0	0	0	0	12	7	6	6	4	4
ENSGALG00000004662	27	40	44	41	48	41	36	47	43	32	38	25
ENSGALG00000029930	18	26	26	20	34	18	25	42	22	31	17	18
ENSGALG00000014747	457	501	455	558	776	497	519	485	538	445	576	471
ENSGALG00000043605	7	19	12	11	14	23	20	12	4	10	3	7
ENSGALG00000037172	1160	1340	978	945	1421	1328	2823	2957	2761	2309	2484	2482
ENSGALG00000016761	7	4	8	15	14	15	57	53	50	26	39	33
ENSGALG00000009978	77	96	100	110	141	105	111	87	108	86	133	107
ENSGALG00000034959	6	7	3	4	5	3	230	256	203	186	159	138
ENSGALG00000035512	6	25	17	11	16	10	28	13	11	9	7	12
ENSGALG00000043112	0	0	0	0	0	0	0	1	0	0	0	0
ENSGALG00000017184	75	100	121	124	144	126	110	97	116	79	103	92
ENSGALG00000012874	116	178	171	149	213	162	179	191	143	150	163	141
ENSGALG00000014064	259	362	319	307	413	312	470	514	440	392	459	474
ENSGALG00000033261	0	0	0	0	0	0	0	0	0	0	0	0
ENSGALG00000036492	213	307	314	255	352	274	315	286	252	231	231	214
ENSGALG00000016186	162	178	174	167	245	139	179	179	200	163	162	159
ENSGALG00000040973	0	0	0	0	0	0	0	0	0	0	0	0
[truncated: 24,103 more rows]
